# Supplementary material for: Dietary interventions in cancer: a systematic review of all randomized controlled trials
Source: PubMed Central journal article supplement (PMC11223872; doi:10.1093/jnci/djae051), 2024-03-01
Supplement: djae051_supplementary_data.pdf [file djae051_supplementary_data.pdf]

## Supplementary Table 1

Here is a listing of all included RCTs testing dietary interventions for cancer patients with reported sample size and primary endpoint as well as the assigned endpoint categorization and trial setting.

| Title                                                                                                                                                                                                               | Sample size | Primary Endpoint                                                                    | Endpoint Categorized                 | Trial Setting                     | PubMed ID |
|---------------------------------------------------------------------------------------------------------------------------------------------------------------------------------------------------------------------|-------------|-------------------------------------------------------------------------------------|--------------------------------------|-----------------------------------|-----------|
| Lack of effect of a high-fiber cereal supplement on the recurrence of colorectal adenomas                                                                                                                           | 1429        | Presence or absence of new adenomas                                                 | Cancer measurement                   | Secondary prevention/survivorship | 10770890  |
| Impact of Preoperative Acetaminophen and Carbohydrate Loading on Pain and Functional Status in Patients Undergoing Mohs Micrographic Surgery for Nonmelanoma Skin Cancers                                           | 96          | Perioperative and radiation pain, thirst, hunger, anxiety, and fatigue              | Postoperative Misc endpoint          | Adjuvant                          | 31725692  |
| Oral nutritional supplement (ONS) reduced weight loss and optimised preoperative energy and nutrient intake in colorectal cancer patients undergoing surgery                                                        | 30          | Weight loss and preoperative energy intake                                          | Weight/Composition/Muscle            | Adjuvant                          | Not found |
| A Translational Randomized Trial of Perioperative Arginine Immunonutrition on Natural Killer Cell Function in Colorectal Cancer Surgery Patients                                                                    | 24          | NK cell cytotoxicity, activity, and cell number                                     | Translational/Basic Science Endpoint | Adjuvant                          | 35913670  |
| Vitamin D Supplementation and Survival in Metastatic Colorectal Cancer                                                                                                                                              | 71          | Overall survival                                                                    | Overall Survival                     | Palliative                        | 29533115  |
| Effects of perioperative Eicosapentaenoic acid-enriched oral nutritional supplement on lean body mass after total gastrectomy for gastric cancer                                                                    | 126         | Lean body mass                                                                      | Weight/Composition/Muscle            | Adjuvant                          | 30854113  |
| Efficacy of ω-3 supplementation on nutritional status, skeletal muscle, and chemoradiotherapy toxicity in cervical cancer patients: A randomized, triple-blind, clinical trial conducted in a middle-income country | 46          | Skeletal muscle quality and quantity, nutritional status, and chemotherapy toxicity | Weight/Composition/Muscle            | Adjuvant                          | Not found |
| Effects of a parallel-arm randomized controlled weight loss pilot study on biological and psychosocial parameters of overweight and obese breast cancer survivors                                                   | 21          | Body weight, biomarkers, QOL, and fitness level                                     | Weight/Composition/Muscle            | Secondary prevention/survivorship | 28702218  |
| Phase II prospective randomized trial of a low-fat diet with fish oil supplementation in men undergoing radical prostatectomy                                                                                       | 55          | IGF1 Levels, serum IGFBP-1, markers of proliferation, and apoptosis                 | Translational/Basic Science Endpoint | Adjuvant                          | 22027686  |
| Randomized study to compare the compliance of two prescription of nutritional supplementation in oncology inpatients                                                                                                | 36          | Compliance                                                                          | Compliance/Adherence/Feasibility     | Misc/Mixed                        | Not found |
| The Impact of a Ketogenic Dietary Intervention on the Quality of Life of Stage II and III Cancer Patients: A Randomized Controlled Trial in the Caribbean                                                           | 40          | Quality of Life (EORTC QLQ-C30)                                                     | Quality of Life                      | Adjuvant                          | 32791011  |
| Mediterranean-style dietary pattern improves cancer-related fatigue and quality of life in men with prostate cancer treated with androgen deprivation therapy: A pilot randomised controlled trial                  | 23          | Cancer related fatigue and quality of life (FACIT-F) and (FACIT-G)                  | Quality of Life                      | Misc/Mixed                        | 35565100  |
| The impact of a mediterranean-style dietary pattern on cancer-related fatigue and quality of life in men with prostate cancer treated with androgen deprivation therapy: A pilot study                              | 12          | Cancer related fatigue and quality of life [FACT-F] and [FACT-G]                    | Quality of Life                      | Misc/Mixed                        | Not found |
| Simple nutritional intervention in patients with advanced cancers of the gastrointestinal tract, non-small cell lung cancers or mesothelioma and weight loss receiving chemotherapy: a randomised controlled trial  | 358         | Overall survival                                                                    | Overall Survival                     | Palliative                        | 21733143  |
| The effect of perioperative immunonutrition on surgical complications and quality of life in patients with head and neck cancer                                                                                     | 34          | Nutritional status, anthropometrics and QoL ( EORTC QLQ-C30, EORTC QLQ-H & N35)     | Postoperative Misc endpoint          | Adjuvant                          | Not found |
| The effects of short-term fasting on quality of life and tolerance to chemotherapy in patients with breast and ovarian cancer: A randomized cross-over pilot study                                                  | 50          | Quality of life (FACIT), fatigue, and well-being                                    | Quality of Life                      | Adjuvant                          | 29699509  |
| The use of a protein and energy dense eicosapentaenoic acid containing supplement for malignancy-related weight loss in children                                                                                    | 52          | Percent subjects showing weight loss and BMI loss                                   | Weight/Composition/Muscle            | Adjuvant                          | 19090549  |
| Comparing diets for weight loss and improvement in biomarkers in men with prostate cancer on surveillance: A pilot study                                                                                            | 30          | Improvement in nutritional biomarkers                                               | Translational/Basic Science Endpoint | Secondary prevention/survivorship | Not found |
| Influence of dietary factors on actinically-induced skin cancer                                                                                                                                                     | 115         | Occurrence of precancerous keratoses and NMSC                                       | Cancer measurement                   | Secondary prevention/survivorship | 9920444   |
| A double-blind phase III trial of immunomodulating nutritional formula during adjuvant chemoradiotherapy in head and neck cancer patients: IMPATOX                                                                  | 180         | Incidence of grade 3/4 mucositis                                                    | Non-standard Quality of Life         | Adjuvant                          | 32936874  |
| Effect of soy protein isolate supplementation on biochemical recurrence of prostate cancer after radical prostatectomy: A randomized trial                                                                          | 177         | Biochemical recurrence of cancer (PSA level)                                        | Cancer measurement                   | Secondary prevention/survivorship | 33764851  |
| Modification of the response to chemotherapy of HER2 negative metastatic breast cancer by lipids of marine origin: A controlled, randomized, double blind dietary supplementation trial                             | 65          | Progression free survival                                                           | Cancer measurement                   | Adjuvant                          | Not found |
| Nutritional advice in older patients at risk of malnutrition during treatment for chemotherapy: a two-year randomized controlled trial                                                                              | 341         | One year survival                                                                   | Overall Survival                     | Adjuvant                          | 25265392  |
| Glutamine supplementation in cancer patients receiving chemotherapy: A double-blind randomized study                                                                                                                | 65          | Incidence/severity of diarrhea and tumor response                                   | Non-standard Quality of Life         | Adjuvant                          | 9263281   |
| Preoperative oral arginine and n-3 fatty acid supplementation improves the immunometabolic host response and outcome after colorectal resection for cancer                                                          | 200         | Immune response, gut oxygenation, and postoperative infection                       | Postoperative Misc endpoint          | Adjuvant                          | 12464864  |
| Immune and nutritional effects of early enteral nutrition after major abdominal operations                                                                                                                          | 60          | Immunological and nutritional variables                                             | Translational/Basic Science Endpoint | Adjuvant                          | 8639722   |

|                                                                                                                                                                                                                                                |      |                                                                                                                            |                                      |                                   |           |
|------------------------------------------------------------------------------------------------------------------------------------------------------------------------------------------------------------------------------------------------|------|----------------------------------------------------------------------------------------------------------------------------|--------------------------------------|-----------------------------------|-----------|
| Effect of fish oil on appetite and other symptoms in patients with advanced cancer and anorexia/cachexia: a double-blind, placebo-controlled study                                                                                             | 60   | Appetite, tiredness, calorie intake, weight loss, nausea, well being, and nutritional status                               | Non-standard Quality of Life         | Palliative                        | 12506181  |
| Whey Protein Supplementation Improves Nutritional Status, Glutathione Levels, and Immune Function in Cancer Patients: A Randomized, Double-Blind Controlled Trial                                                                              | 48   | Serum albumin, glutathione (GSH) levels, immunity, and inflammatory markers                                                | Translational/Basic Science Endpoint | Adjuvant                          | 29565716  |
| Monitoring dietary change in a low-fat diet intervention study: advantages of using 24-hour dietary recalls vs food records                                                                                                                    | 290  | Evaluation of dietary assessment methods for monitoring change in fat intake                                               | Compliance/Adherence/Feasibility     | Misc/Mixed                        | Not found |
| The influence of low fat, low lactose diet on diarrhoea during pelvic radiotherapy                                                                                                                                                             | 143  | Radiation-induced diarrhea, nausea, and vomiting                                                                           | Non-standard Quality of Life         | Adjuvant                          | 7900512   |
| The impact of preoperative immunonutrition and other nutrition models on tumor infiltrative lymphocytes in colorectal cancer patients                                                                                                          | 28   | Tumor infiltrative lymphocytes in endoscopic tissue biopsy specimens                                                       | Translational/Basic Science Endpoint | Adjuvant                          | 23010614  |
| A Whole-Food, Plant-Based (WFPB) dietary intervention to improve outcomes in patients with metastatic breast cancer                                                                                                                            | 28   | Compliance, weight, cardiometabolic outcomes, and cancer progression markers                                               | Compliance/Adherence/Feasibility     | Palliative                        | 38045318  |
| A Dietary Intervention for Recurrent Prostate Cancer After Definitive Primary Treatment: Results of a Randomized Pilot Trial                                                                                                                   | 36   | Compliance                                                                                                                 | Compliance/Adherence/Feasibility     | Adjuvant                          | 18400281  |
| Effect of Nutritional Supplementation Enriched with Eicosapentaenoic Acid on Inflammatory Profile of Patients With Oral Cavity Cancer in Antineoplastic Pretreatment: A Controlled and Randomized Clinical Trial                               | 64   | Inflammatory profile                                                                                                       | Translational/Basic Science Endpoint | Adjuvant                          | 28128983  |
| Pancreatic enzyme supplementation after gastrectomy for gastric cancer: a randomized controlled trial                                                                                                                                          | 43   | Nutritional status and QOL                                                                                                 | Weight/Composition/Muscle            | Adjuvant                          | 28804801  |
| Social cognitive outcomes are associated with improvements in mobility performance following lifestyle intervention in prostate cancer patients undergoing androgen deprivation therapy                                                        | 32   | Lift and carry performance and mobility-related self-efficacy belief                                                       | Non-standard Quality of Life         | Adjuvant                          | 35085341  |
| Role of enteral immunonutrition in patients with gastric carcinoma undergoing major surgery                                                                                                                                                    | 40   | Immune and nutritional parameters                                                                                          | Translational/Basic Science Endpoint | Adjuvant                          | 15851366  |
| Effects of Five-Step Nutritional Interventions Conducted by a Multidisciplinary Care Team on Gastroenteric Cancer Patients Undergoing Chemotherapy: A Randomized Clinical Trial                                                                | 78   | Nutritional status via Patient-Generated Subjective Global Assessment                                                      | Weight/Composition/Muscle            | Adjuvant                          | 35903847  |
| A Phase 3 Randomized Trial of Nicotinamide for Skin-Cancer Chemoprevention                                                                                                                                                                     | 386  | Number of new histologically confirmed non-melanoma skin cancers                                                           | Cancer measurement                   | Secondary prevention/survivorship | 26488693  |
| The influence of low-carbohydrate diets on the metabolic response to androgen-deprivation therapy in prostate cancer                                                                                                                           | 40   | Serum metabolites                                                                                                          | Translational/Basic Science Endpoint | Misc/Mixed                        | 33949711  |
| Arginine, glutamine, and fish oil supplementation in cancer patients treated with concurrent chemoradiotherapy: A randomized control study                                                                                                     | 88   | Incidence of acute toxicities                                                                                              | Non-standard Quality of Life         | Adjuvant                          | 31146957  |
| Dietary fat reduction in postmenopausal women with primary breast cancer: Phase III Women's Intervention Nutrition Study (WINS)                                                                                                                | 2437 | Relapse free survival                                                                                                      | Cancer measurement                   | Secondary prevention/survivorship | Not found |
| Effects of Single Nucleotide Polymorphisms and Mediterranean Diet in Overweight or Obese Postmenopausal Women With Breast Cancer Receiving Adjuvant Hormone Therapy: A Pilot Randomized Controlled Trial                                       | 78   | Weight loss, modification of nutrient intake, and metabolic parameters                                                     | Weight/Composition/Muscle            | Secondary prevention/survivorship | 35845810  |
| Preoperative Immunonutrition in Liver Resection for Cancer: Results of the PROPILS Trial, a Multicenter Randomized Controlled Phase IV Trial                                                                                                   | 399  | Overall complications classified in grade 2-3-4 or 5 by DINDO-CLAVIEN                                                      | Postoperative Misc endpoint          | Adjuvant                          | Not found |
| Changes in dietary habits of women with breast cancer: preliminary results of a randomized controlled trial                                                                                                                                    | 35   | Dietary intake and adherence                                                                                               | Compliance/Adherence/Feasibility     | Adjuvant                          | Not found |
| A ketogenic diet reduces central obesity and serum insulin in women with ovarian or endometrial cancer                                                                                                                                         | 73   | Fasting insulin, glucose, and beta-hydroxybuterate                                                                         | Weight/Composition/Muscle            | Misc/Mixed                        | 30137481  |
| Effect of nutritional counseling combined with oral nutritional supplements on clinical outcome of esophageal cancer patients under radiotherapy treatment                                                                                     | 80   | Energy intake and markers of nutritional status                                                                            | Non-standard Quality of Life         | Adjuvant                          | Not found |
| Impact of glutamine, eicosapentamethanoic acid, branched-chain amino acid supplements on nutritional status and treatment compliance of esophageal cancer patients on concurrent chemoradiotherapy and gastric cancer patients on chemotherapy | 104  | Body compositions, blood indicators of nutritional status, the incidence of complications, and completion rates of therapy | Weight/Composition/Muscle            | Adjuvant                          | 26080850  |
| Effect of oral nutritional supplementation on nutritional status and quality of life in patients with gastric cancer after operation (23 cases RCT observations)                                                                               | 25   | Body mass and body mass index                                                                                              | Weight/Composition/Muscle            | Adjuvant                          | Not found |
| Enteral nutrition with supplemental arginine, RNA, and omega-3 fatty acids in patients after operation: Immunologic, metabolic, and clinical outcome                                                                                           | 85   | Post-operative infections                                                                                                  | Postoperative Misc endpoint          | Adjuvant                          | 1377838   |
| A Randomized Double-Blind Placebo-Controlled Trial of Fruit and Vegetable Concentrates on Intermediate Biomarkers in Head and Neck Cancer                                                                                                      | 134  | P27 expression                                                                                                             | Translational/Basic Science Endpoint | Secondary prevention/survivorship | 28102098  |
| Fish oil supplementation and inflammatory response during neoadjuvant chemoradiation for rectal cancer: Results from a prospective, randomized, controlled trial                                                                               | 114  | CRP, albumin, and Glasgow prognostic score                                                                                 | Translational/Basic Science Endpoint | Adjuvant                          | Not found |

|                                                                                                                                                                                                                       |     |                                                                        |                                      |                                   |           |
|-----------------------------------------------------------------------------------------------------------------------------------------------------------------------------------------------------------------------|-----|------------------------------------------------------------------------|--------------------------------------|-----------------------------------|-----------|
| Preoperative Fasting Abbreviation With Whey Protein Reduces the Occurrence of Postoperative Complications in Patients With Head and Neck Cancer: A Randomized Clinical Trial                                          | 49  | Postoperative complications                                            | Postoperative Misc endpoint          | Adjuvant                          | 33373478  |
| Fasting mimicking diet as an adjunct to neoadjuvant chemotherapy for breast cancer in the multicentre randomized phase 2 DIRECT trial                                                                                 | 131 | Grade 3/4 toxicity                                                     | Non-standard Quality of Life         | Adjuvant                          | 32576828  |
| A randomized clinical trial with oral immunonutrition ( $\omega$ 3-enhanced formula vs. arginine-enhanced formula) in ambulatory head and neck cancer patients                                                        | 73  | Nutritional variables                                                  | Weight/Composition/Muscle            | Adjuvant                          | 15802904  |
| Fish oil supplementation during chemotherapy increases posterior time to tumor progression in colorectal cancer                                                                                                       | 30  | Time to disease progression                                            | Cancer measurement                   | Adjuvant                          | 26700096  |
| Nutritional intervention contributes to the improvement of symptoms related to quality of life in breast cancer patients undergoing neoadjuvant chemotherapy: A randomized clinical trial                             | 34  | Quality of life EORTC                                                  | Quality of Life                      | Adjuvant                          | Not found |
| Nutrition therapy in cachectic cancer patients. The Tight Caloric Control (TiCaCo) pilot trial                                                                                                                        | 20  | Recovery of body composition after nutrition therapy                   | Weight/Composition/Muscle            | Cachexia/malnutrition             | Not found |
| Nutrition therapy promotes overall survival in cachectic cancer patients through a biophysical pathway: the ticaconco trial                                                                                           | 60  | Overall survival                                                       | Overall Survival                     | Adjuvant                          | Not found |
| Benefits of immunonutrition in patients with head and neck cancer receiving chemoradiation: A phase II randomized, double-blind study                                                                                 | 110 | Prevention of severe oral mucositis                                    | Non-standard Quality of Life         | Adjuvant                          | 35007812  |
| Results of a diet/exercise feasibility trial to prevent adverse body composition change in breast cancer patients on adjuvant chemotherapy                                                                            | 90  | Change in body composition                                             | Weight/Composition/Muscle            | Adjuvant                          | 18501061  |
| Flaxseed supplementation (not dietary fat restriction) reduces prostate cancer proliferation rates in men presurgery                                                                                                  | 161 | Tumor proliferation rate                                               | Translational/Basic Science Endpoint | Adjuvant                          | 19064574  |
| Presurgical weight loss affects tumour traits and circulating biomarkers in men with prostate cancer                                                                                                                  | 40  | Adherence/retention                                                    | Compliance/Adherence/Feasibility     | Adjuvant                          | 28881355  |
| Randomized trial of weight loss in primary breast cancer: Impact on body composition, circulating biomarkers and tumor characteristics                                                                                | 33  | Weight change                                                          | Weight/Composition/Muscle            | Adjuvant                          | 31442303  |
| Observation on application effect of TCM diet intervention in improving malnutrition in patients with end-stage liver cancer                                                                                          | 120 | Nutritional status                                                     | Weight/Composition/Muscle            | Palliative                        | Not found |
| Effects of a high dose, aglycone-rich soy extract on prostate-specific antigen and serum isoflavone concentrations in men with localized prostate cancer                                                              | 66  | Serum PSA                                                              | Cancer measurement                   | Secondary prevention/survivorship | 21058191  |
| A Very-Low-Fat Vegan Diet Increases Intake of Protective Dietary Factors and Decreases Intake of Pathogenic Dietary Factors                                                                                           | 93  | Intake of protective and pathogenic factors of chronic diseases        | Compliance/Adherence/Feasibility     | Misc/Mixed                        | 18237581  |
| Effects of nutritional support in patients with colorectal cancer                                                                                                                                                     | 628 | Nutritional status and survival                                        | Weight/Composition/Muscle            | Palliative                        | 18982745  |
| Effect of adequate nutrition therapy in rectal carcinoma post-surgery patients                                                                                                                                        | 24  | Serum CRP and blood glucose levels                                     | Translational/Basic Science Endpoint | Adjuvant                          | Not found |
| A diet and exercise intervention during Chemotherapy for breast cancer                                                                                                                                                | 40  | Feasibility                                                            | Compliance/Adherence/Feasibility     | Adjuvant                          | 22238561  |
| In a randomized trial in prostate cancer patients, dietary protein restriction modifies markers of leptin and insulin signaling in plasma extracellular vesicles                                                      | 38  | Molecular mediators in extracellular vesicles (insulin sensitivity)    | Translational/Basic Science Endpoint | Adjuvant                          | Not found |
| Oral Nutritional Supplementation in Cancer Patients Who Were Receiving Chemo/Chemoradiation Therapy: A Multicenter, Randomized Phase II Study                                                                         | 89  | Body weight and percent fat-free mass                                  | Weight/Composition/Muscle            | Adjuvant                          | 32363940  |
| Reduced infections with perioperative immunonutrition in head and neck cancer: Exploratory results of a multicenter, prospective, randomized, double-blind study                                                      | 298 | Incidence of postoperative infectious complications                    | Postoperative Misc endpoint          | Adjuvant                          | 24182765  |
| Perioperative nutritional support in patients undergoing hepatectomy for hepatocellular carcinoma                                                                                                                     | 124 | Postoperative morbidity (anthropometric, biochemical, and immunologic) | Postoperative Misc endpoint          | Adjuvant                          | 7969324   |
| Total parenteral alimentation with glutamine supplementation for the prevention of common complications in patients undergoing hematopoietic stem cell transplantation                                                | 48  | Post-BMT complications (mucositis, diarrhea, and infection)            | Non-standard Quality of Life         | Adjuvant                          | Not found |
| Effect of conjugated linoleic acid supplementation on quality of life in rectal cancer patients undergoing preoperative chemoradiotherapy                                                                             | 33  | Quality of Life (EORTC QLQ-C30)                                        | Quality of Life                      | Adjuvant                          | 28523042  |
| Effects of $\omega$ -3 supplementation on the nutritional status, immune, and inflammatory profiles of gastric cancer patients: A randomized controlled trial                                                         | 83  | Weight modification                                                    | Weight/Composition/Muscle            | Adjuvant                          | 30710885  |
| Effects of a nutrition intervention on acute and late bowel symptoms and health-related quality of life up to 24 months post radiotherapy in patients with prostate cancer: a multicentre randomised controlled trial | 180 | Bowel symptoms (EORTC QLQ-C30)                                         | Quality of Life                      | Adjuvant                          | 31758324  |
| Dynamic metabolic response of prostate cancer patients treated with ADT and low carb diet                                                                                                                             | 57  | PSA doubling time                                                      | Cancer measurement                   | Palliative                        | Not found |
| A Randomized Controlled Trial of a 6-Month Low-Carbohydrate Intervention on Disease Progression in Men with Recurrent Prostate Cancer: Carbohydrate and Prostate Study 2 (CAPS2)                                      | 35  | Weight loss                                                            | Weight/Composition/Muscle            | Misc/Mixed                        | 33712498  |
| Effect of postoperative diet nursing with patient involved on nutritional status of the patients with rectal cancer                                                                                                   | 88  | Nutritional status                                                     | Weight/Composition/Muscle            | Adjuvant                          | Not found |

|                                                                                                                                                                                                                                                              |     |                                                                                                       |                                      |                                   |           |
|--------------------------------------------------------------------------------------------------------------------------------------------------------------------------------------------------------------------------------------------------------------|-----|-------------------------------------------------------------------------------------------------------|--------------------------------------|-----------------------------------|-----------|
| Effect of Targeted Nutritional Intervention on Intestinal Flora, Defecation Function, and Postoperative Complications in Patients Who Underwent Radical Resection of Rectal Carcinoma                                                                        | 136 | Intestinal flora                                                                                      | Translational/Basic Science Endpoint | Adjuvant                          | Not found |
| Randomized comparison of cooked and noncooked diets in patients undergoing remission induction therapy for acute myeloid leukemia                                                                                                                            | 153 | Major infection                                                                                       | Non-standard Quality of Life         | Adjuvant                          | 18955453  |
| Effect of Standardized Nutritional Intervention in Patients with Nasopharyngeal Carcinoma Receiving Radiotherapy Complicated with Diabetes Mellitus                                                                                                          | 100 | Glucose level                                                                                         | Weight/Composition/Muscle            | Adjuvant                          | 35756497  |
| Immune Nutrition in Head and Neck Cancer. A Double Blind Randomised Controlled Trial of Perioperative Immune Enhancing Feeds in Patients with Advanced Head and Neck Cancer                                                                                  | 67  | Postoperative infections                                                                              | Postoperative Misc endpoint          | Adjuvant                          | Not found |
| A randomized controlled trial of preoperative oral supplementation with a specialized diet in patients with gastrointestinal cancer                                                                                                                          | 305 | Reduction of postoperative infection rate and length of postoperative stay                            | Postoperative Misc endpoint          | Adjuvant                          | 12055582  |
| Route and composition of postoperative nutritional support: Impact on immune-metabolic response and postoperative outcome                                                                                                                                    | 260 | Immune response                                                                                       | Translational/Basic Science Endpoint | Adjuvant                          | Not found |
| Short-term preoperative supplementation of an immunoenriched diet does not improve clinical outcome in well-nourished patients undergoing abdominal cancer surgery                                                                                           | 108 | Overall rate of postoperative complications                                                           | Postoperative Misc endpoint          | Adjuvant                          | Not found |
| Evaluation of perioperative nutritional therapy in patients with gastrointestinal tract neoplasms                                                                                                                                                            | 50  | Gastrointestinal and infectious complications and length of hospital stay                             | Postoperative Misc endpoint          | Adjuvant                          | 22072355  |
| Efficacy evaluation of an oral powder supplement enriched with eicosapentaenoic acid in cancer patients                                                                                                                                                      | 61  | Anthropometric measurements and nutritional status                                                    | Weight/Composition/Muscle            | Misc/Mixed                        | 22411387  |
| A combination of tomato and soy products for men with recurring prostate cancer and rising prostate specific antigen                                                                                                                                         | 41  | Compliance                                                                                            | Compliance/Adherence/Feasibility     | Misc/Mixed                        | 18444145  |
| Effects of a dietary intervention to increase omega-3 intake compared to dutasteride in men with low-risk prostate cancer under active surveillance: Preliminary results on fatty acid intake and fatty acid profiles of red blood cells and prostate tissue | 120 | Omega-3 dietary intake, fatty acid profiles of red blood cells, and prostate tissue                   | Translational/Basic Science Endpoint | Secondary prevention/survivorship | Not found |
| The effect of immunonutrition on tumor infiltrative t lymphocytes and regulatory t cells in rectal tumor patients receiving neoadjuvant chemoradiotherapy: a prospective randomized clinical study                                                           | 40  | Tumor-infiltrating lymphocytes, and regulatory T cells                                                | Translational/Basic Science Endpoint | Adjuvant                          | 36326418  |
| Effects of emotional intervention and Chinese medicated diet in improving the quality of life in patients with liver cancer after chemotherapy                                                                                                               | 94  | Quality of life (unspecified scale)                                                                   | Non-standard Quality of Life         | Adjuvant                          | Not found |
| A Pilot Randomised Controlled Trial Examining the Benefit of a Neutropenic Diet for Children Undergoing Cancer Treatment                                                                                                                                     | 42  | Febrile neutropenia rate                                                                              | Non-standard Quality of Life         | Adjuvant                          | 35225115  |
| Assessment of Nutritional Status in Children with Cancer and Effectiveness of Oral Nutritional Supplements                                                                                                                                                   | 45  | Anthropometric measurements and biochemical parameters (serum albumin, prealbumin, and total protein) | Weight/Composition/Muscle            | Misc/Mixed                        | 26418028  |
| Application of Glutamine-enriched nutrition therapy in childhood acute lymphoblastic leukemia                                                                                                                                                                | 48  | Indicators of general nutritional status such as weight, height, and triceps skinfold thickness       | Weight/Composition/Muscle            | Adjuvant                          | 27401338  |
| Prospective randomized investigation implementing immunonutritional therapy using a nutritional supplement with a high blend ratio of $\omega$ -3 fatty acids during the perioperative period for head and neck carcinomas                                   | 28  | Nutritional status (anthropometric measurement)                                                       | Weight/Composition/Muscle            | Adjuvant                          | 29420749  |
| Miami NICE trial: Nutritional support for patients incurring chemotherapy side effects                                                                                                                                                                       | 50  | Change in BMI                                                                                         | Weight/Composition/Muscle            | Misc/Mixed                        | Not found |
| Randomized controlled clinical trial assessing the effects of oral nutritional supplements in postoperative gastric cancer patients                                                                                                                          | 157 | Postoperative body weight loss                                                                        | Postoperative Misc endpoint          | Adjuvant                          | 27807617  |
| Change in women's diet and body mass following intensive intervention for early-stage breast cancer                                                                                                                                                          | 180 | Dietary intake and body mass                                                                          | Weight/Composition/Muscle            | Adjuvant                          | 11320947  |
| Immunonutrition in elective gastrointestinal surgery patients                                                                                                                                                                                                | 100 | Postoperative complications                                                                           | Postoperative Misc endpoint          | Adjuvant                          | 17461312  |
| Dietary intervention as adjuvant therapy in breast cancer patients - a feasibility study                                                                                                                                                                     | 240 | Daily energy and nutrient intake                                                                      | Compliance/Adherence/Feasibility     | Adjuvant                          | 2265258   |
| A double-blind randomized controlled trial of the effects of eicosapentaenoic acid supplementation on muscle inflammation and physical function in patients undergoing colorectal cancer resection                                                           | 64  | Cardiorespiratory fitness, physical strength, and lean muscle mass                                    | Weight/Composition/Muscle            | Adjuvant                          | 31648815  |
| Efficacy of Omega Fatty Acid Supplementation on mRNA Expression Level of Tumor Necrosis Factor Alpha in Patients with Gastric Adenocarcinoma                                                                                                                 | 34  | TNF-alpha mRNA expression                                                                             | Translational/Basic Science Endpoint | Adjuvant                          | 27170003  |
| A prospective randomized controlled trial on the value of prophylactic oral nutritional supplementation in locally advanced nasopharyngeal carcinoma patients receiving chemo-radiotherapy                                                                   | 114 | Nutritional status and weight loss                                                                    | Weight/Composition/Muscle            | Adjuvant                          | 33032180  |
| The impact of nutrition support on body composition in cancer outpatients receiving radiotherapy                                                                                                                                                             | 36  | Body weight and composition                                                                           | Weight/Composition/Muscle            | Adjuvant                          | 15226773  |
| Oral nutritional support can shorten the duration of parenteral hydration in end-of-life cancer patients: A randomized controlled trial                                                                                                                      | 27  | Drip infusion in vein (DIV)-free survival                                                             | Non-standard Quality of Life         | Palliative                        | 25437180  |
| Efficacy of EPA-enriched supplement compared with standard formula on body weight changes in malnourished patients with head and neck cancer undergone surgery: a randomized study                                                                           | 65  | Perioperative weight changes                                                                          | Weight/Composition/Muscle            | Cachexia/malnutrition             | 31647147  |

|                                                                                                                                                                                                                                                           |     |                                                                         |                                      |                                   |           |
|-----------------------------------------------------------------------------------------------------------------------------------------------------------------------------------------------------------------------------------------------------------|-----|-------------------------------------------------------------------------|--------------------------------------|-----------------------------------|-----------|
| An eicosapentaenoic acid supplement versus megestrol acetate versus both for patients with cancer-associated wasting: A North Central Cancer Treatment Group and National Cancer Institute of Canada collaborative effort                                 | 421 | 10% weight gain above baseline                                          | Weight/Composition/Muscle            | Cachexia/malnutrition             | 15197210  |
| Structured triglycerides were well tolerated and induced after hepatectomy in patients with hepatocarcinoma                                                                                                                                               | 49  | Liver functions, biochemical variables, and postoperative complications | Translational/Basic Science Endpoint | Adjuvant                          | Not found |
| Effect of glutamine's nutrition support on the postoperative nutrition and immune function in malignant tumor of gynecology patients                                                                                                                      | 60  | Postoperative nutrition and immune function                             | Postoperative Misc endpoint          | Adjuvant                          | 25016261  |
| Benefits of Oral Nutritional Supplements in Patients with Locally Advanced Nasopharyngeal Cancer during Concurrent Chemoradiotherapy: An Exploratory Prospective Randomized Trial                                                                         | 100 | Body weight, BMI, and nutritional status                                | Weight/Composition/Muscle            | Adjuvant                          | 30633580  |
| Vitamin d supplementation and disease-free survival in stage ii melanoma: A randomized placebo controlled trial                                                                                                                                           | 104 | Disease free survival                                                   | Cancer measurement                   | Secondary prevention/survivorship | 34199802  |
| Muscle mass, strength, and index in various models of preoperative immunonutrition in invasive gastric cancer patients                                                                                                                                    | 46  | Lean body mass, muscle strength, and skeletal muscle mass and index     | Weight/Composition/Muscle            | Adjuvant                          | Not found |
| Preoperative nutritional support in cancer patients with no clinical signs of malnutrition—prospective randomized controlled trial                                                                                                                        | 113 | Nutritional status measured by change in weight and lab parameters      | Weight/Composition/Muscle            | Adjuvant                          | 25091056  |
| Phagocytic activity of blood platelets in various models of preoperative oral immunonutrition in invasive cancer patients                                                                                                                                 | 52  | Phagocytic activity of thrombocytes                                     | Translational/Basic Science Endpoint | Adjuvant                          | Not found |
| Lymphocyte subpopulation in a model of preoperative oral and parenteral glutamine-based immunonutrition in patients with invasive gastric cancer                                                                                                          | 46  | Total content of lymphocytes and their subpopulations                   | Translational/Basic Science Endpoint | Adjuvant                          | Not found |
| Efficacy of perioperative immunonutrition in esophageal cancer patients undergoing esophagectomy                                                                                                                                                          | 40  | Number of infectious complications                                      | Postoperative Misc endpoint          | Adjuvant                          | 30468936  |
| A Prospective Randomized Controlled Trial to Study the Impact of a Nutrition-Sensitive Intervention on Adult Women with Cancer Cachexia Undergoing Palliative Care in India                                                                               | 63  | Body weight                                                             | Weight/Composition/Muscle            | Cachexia/malnutrition             | Not found |
| Randomized study of prevention of gastrointestinal toxicities by nutritional support using an amino acid-rich elemental diet during chemotherapy in patients with esophageal cancer (KDOG 1101)                                                           | 71  | Incidence of grade 2 or higher GI toxicity                              | Non-standard Quality of Life         | Adjuvant                          | 33009977  |
| Effects of 4 weeks of Lactobacillus plantarum 299v supplementation on nutritional status, enteral nutrition tolerance, and quality of life in cancer patients receiving home enteral nutrition - A double-blind, randomized, and placebo-controlled trial | 35  | Nutritional status                                                      | Weight/Composition/Muscle            | Misc/Mixed                        | 33015813  |
| Early postoperative enteral nutrition with arginine- $\omega$ -3 fatty acids and ribonucleic acid-supplemented diet versus placebo in cancer patients: An immunologic evaluation of Impact®                                                               | 42  | Postoperative immunologic responses                                     | Translational/Basic Science Endpoint | Adjuvant                          | 7536138   |
| Early enteral feeding in postsurgical cancer patients. Fish oil structured lipid-based polymeric formula versus a standard polymeric formula                                                                                                              | 50  | Safety and tolerance                                                    | Compliance/Adherence/Feasibility     | Adjuvant                          | 8604913   |
| Effects of Ketogenic metabolic therapy on patients with breast cancer: A randomized controlled clinical trial                                                                                                                                             | 80  | Response rate                                                           | Cancer measurement                   | Adjuvant                          | Not found |
| A Randomized Clinical Trial of Preoperative Administration of Branched-Chain Amino Acids to Prevent Postoperative Ascites in Patients with Liver Resection for Hepatocellular Carcinoma                                                                   | 77  | Development for postoperative refractory ascites                        | Postoperative Misc endpoint          | Adjuvant                          | 27338747  |
| The impact of nutritional support on treatment-related complications, qol and survival in lung cancer patients undergoing radiotherapy: A randomized, controlled study                                                                                    | 45  | Toxicity                                                                | Non-standard Quality of Life         | Adjuvant                          | Not found |
| The effects of patient participation-based dietary intervention on nutritional and functional status for patients with gastrectomy: A randomized controlled trial                                                                                         | 56  | Cognitive, affective, behavioral, physical, and functional outcomes     | Non-standard Quality of Life         | Adjuvant                          | 23632471  |
| The Effect of Nutrition Intervention with Oral Nutritional Supplements on Pancreatic and Bile Duct Cancer Patients Undergoing Chemotherapy                                                                                                                | 34  | Anthropometric measures (weight, composition, and PG SGA)               | Weight/Composition/Muscle            | Palliative                        | 31121926  |
| The effect of preoperative nutritional supports on patients with gastrointestinal cancer: Prospective randomized study                                                                                                                                    | 100 | Total antioxidant capacity                                              | Translational/Basic Science Endpoint | Adjuvant                          | 22260826  |
| The Effects of a Mediterranean Diet Intervention on Cancer-Related Fatigue for Patients Undergoing Chemotherapy: A Pilot Randomized Controlled Trial                                                                                                      | 33  | Feasibility                                                             | Compliance/Adherence/Feasibility     | Adjuvant                          | 36077737  |
| The impact of immunostimulating nutrition on infectious complications after upper gastrointestinal surgery: A prospective, randomized, clinical trial                                                                                                     | 205 | Both surgical and non-surgical complications                            | Postoperative Misc endpoint          | Adjuvant                          | 18650630  |
| Standard and immunomodulating enteral nutrition in patients after extended gastrointestinal surgery--a prospective, randomized, controlled clinical trial                                                                                                 | 196 | Number and type of complications and length of hospital stay            | Postoperative Misc endpoint          | Adjuvant                          | 18571296  |
| L-Carnitine-supplementation in advanced pancreatic cancer (CARPAN) - A randomized multicentre trial                                                                                                                                                       | 72  | TNF alpha and L-Carnitine level                                         | Translational/Basic Science Endpoint | Palliative                        | 22824168  |
| Dietary intervention in prostate cancer patients: PSA response in a randomized double-blind placebo-controlled study                                                                                                                                      | 37  | Rise in PSA                                                             | Cancer measurement                   | Misc/Mixed                        | Not found |

|                                                                                                                                                                                                                                                                                                                 |     |                                                                                                               |                                      |                                   |           |
|-----------------------------------------------------------------------------------------------------------------------------------------------------------------------------------------------------------------------------------------------------------------------------------------------------------------|-----|---------------------------------------------------------------------------------------------------------------|--------------------------------------|-----------------------------------|-----------|
| Long term improved quality of life by a 2-week group physical and educational intervention shortly after breast cancer chemotherapy completion. Results of the 'Programme of Accompanying women after breast Cancer treatment completion in Thermal resorts' (PACThe) randomised clinical trial of 251 patients | 251 | Quality of life-SF 36                                                                                         | Quality of Life                      | Adjuvant                          | 23352440  |
| Influence of pre-operative oral carbohydrate loading vs. standard fasting on tumor proliferation and clinical outcome in breast cancer patients – a randomized trial                                                                                                                                            | 61  | Mitotic activity index                                                                                        | Translational/Basic Science Endpoint | Adjuvant                          | 31703648  |
| Nursing Effect and Prognosis of Perioperative Nutritional Support Therapy for Severe Malnutrition Patients with Colorectal Cancer                                                                                                                                                                               | 127 | Post-operative recovery (exhaustion time and hospitalization time)                                            | Postoperative Misc endpoint          | Cachexia/malnutrition             | Not found |
| Early enteral immunonutrition support protects the cellular and humoral immune functions of patients with pancreatic cancer after chemotherapy                                                                                                                                                                  | 78  | Whole blood CD4+ and CD8+, IgG, IgA, and IgM                                                                  | Translational/Basic Science Endpoint | Misc/Mixed                        | Not found |
| The effect of low-nitrogen and low-calorie parenteral nutrition combined with enteral nutrition on inflammatory cytokines and immune functions in patients with gastric cancer: a double blind placebo trial                                                                                                    | 90  | Levels of IgG, IgA and IgM, IL-2, CRP, and TNF $\alpha$                                                       | Translational/Basic Science Endpoint | Adjuvant                          | 25967707  |
| A randomized nutrition counseling intervention in pediatric leukemia patients receiving steroids results in reduced caloric intake                                                                                                                                                                              | 22  | Caloric intake                                                                                                | Compliance/Adherence/Feasibility     | Adjuvant                          | 27615542  |
| Enteral immunonutrition versus enteral nutrition for patients undergoing esophagectomy: a double-blinded randomized controlled trial                                                                                                                                                                            | 99  | Immune indicators                                                                                             | Translational/Basic Science Endpoint | Adjuvant                          | Not found |
| Feasibility of a low-fat/high-fiber diet intervention with soy supplementation in prostate cancer patients after prostatectomy                                                                                                                                                                                  | 40  | Compliance at 4 years                                                                                         | Compliance/Adherence/Feasibility     | Secondary prevention/survivorship | 17392697  |
| A multidisciplinary team approach for nutritional interventions conducted by specialist nurses in patients with advanced colorectal cancer undergoing chemotherapy: A clinical trial                                                                                                                            | 110 | Patient weight, serum albumin, and prealbumin levels                                                          | Weight/Composition/Muscle            | Misc/Mixed                        | 28658162  |
| Effects of Zinc Supplementation on Clinical Outcomes in Patients Receiving Radiotherapy for Head and Neck Cancers: A Double-Blinded Randomized Study                                                                                                                                                            | 97  | Overall survival, disease-free, metastases-free survival rates, and local free survival                       | Overall Survival                     | Adjuvant                          | 17980503  |
| Effect of Psychological Intervention Combined with Dietary Guidance on Quality of Life and Long-Term Efficacy of Bushen Quyu Decoction in Treatment of Patients with Advanced Ovarian Cancer                                                                                                                    | 220 | Quality of life and clinical efficacy according to evaluation criteria for treatment efficacy of solid tumors | Non-standard Quality of Life         | Misc/Mixed                        | 34733335  |
| An enhanced nutritional support pathway including extended preoperative and home enteral nutrition is safe, feasible, and may benefit patients undergoing enhanced recovery after esophagectomy: A pilot randomized clinical trial                                                                              | 63  | Feasibility                                                                                                   | Compliance/Adherence/Feasibility     | Adjuvant                          | Not found |
| A Randomized Study on the Effect of Metformin Combined with Intensive-Exercise Diet Therapy on Glucose and Lipid Metabolism and Islet Function in Patients with Renal Cell Carcinoma and Diabetes                                                                                                               | 120 | Fasting blood glucose, HbA1c, total cholesterol, HDL, LDL, PFS                                                | Translational/Basic Science Endpoint | Secondary prevention/survivorship | Not found |
| Early postoperative jejunostomy feeding with an immune modulating diet in patients undergoing resectional surgery for upper gastrointestinal cancer: a prospective, randomized, controlled, double-blind study                                                                                                  | 120 | Development of infective complications                                                                        | Postoperative Misc endpoint          | Adjuvant                          | Not found |
| Feasibility and efficacy of progressive resistance training and dietary supplements in radiotherapy treated head and neck cancer patients-the DAHANCA 25A study                                                                                                                                                 | 30  | Lean body mass percent                                                                                        | Weight/Composition/Muscle            | Adjuvant                          | 23190359  |
| Analysis of the Effect of Exercise Combined with Diet Intervention on Postoperative Quality of Life of Breast Cancer Patients                                                                                                                                                                                   | 104 | Nutritional endpoint for quality of life (SF-6 & QLQ-C30)                                                     | Non-standard Quality of Life         | Adjuvant                          | 35669367  |
| Palliative Nutritional Intervention in Addition to Cyclooxygenase and Erythropoietin Treatment for Patients with Malignant Disease: Effects on Survival, Metabolism, and Function: A Randomized Prospective Study                                                                                               | 220 | Food intake, energy balance, body composition, and maximum exercise capacity                                  | Weight/Composition/Muscle            | Adjuvant                          | 15112279  |
| The effect of zinc sulfate in the prevention of high-dose chemotherapy-induced mucositis: a double-blind, randomized, placebo-controlled study                                                                                                                                                                  | 60  | Severity of mucositis                                                                                         | Non-standard Quality of Life         | Adjuvant                          | 21692101  |
| Immunonutrition to improve the quality of life of upper gastrointestinal cancer patients undergoing neoadjuvant treatment prior to surgery (NEOIMMUNE): Double blind randomized controlled multi-center clinical trial                                                                                          | 300 | QOL as measured by the EORTC-QLQ-C30                                                                          | Quality of Life                      | Adjuvant                          | Not found |
| Ketogenic diets as an adjuvant therapy for glioblastoma (KEATING): a randomized, mixed methods, feasibility study                                                                                                                                                                                               | 12  | Compliance and retention                                                                                      | Compliance/Adherence/Feasibility     | Adjuvant                          | Not found |
| An exercise and nutrition intervention for ovarian cancer patients during and after first-line chemotherapy (BENITA study): A randomized controlled pilot trial                                                                                                                                                 | 15  | Recruitment rate, adherence to intervention, and completion rate                                              | Compliance/Adherence/Feasibility     | Adjuvant                          | 35197344  |
| The effect of nutritional supplements on food intake in patients undergoing radiotherapy                                                                                                                                                                                                                        | 40  | Protein and caloric intake                                                                                    | Compliance/Adherence/Feasibility     | Adjuvant                          | 10382188  |
| Is supplementation with elemental diet feasible in patients undergoing pelvic radiotherapy?                                                                                                                                                                                                                     | 50  | Compliance                                                                                                    | Compliance/Adherence/Feasibility     | Adjuvant                          | 16289498  |
| Effect of preoperative immunonutrition in patients undergoing hepatectomy; a randomized controlled trial                                                                                                                                                                                                        | 26  | WBC, EPA, Alb, Pre alb, AST, ALT, TG, and FFA                                                                 | Translational/Basic Science Endpoint | Adjuvant                          | 30741015  |

|                                                                                                                                                                                                                                          |      |                                                                                           |                                      |                                   |           |
|------------------------------------------------------------------------------------------------------------------------------------------------------------------------------------------------------------------------------------------|------|-------------------------------------------------------------------------------------------|--------------------------------------|-----------------------------------|-----------|
| Efficacy of prolonged elemental diet therapy after pancreaticoduodenectomy for pancreatic ductal adenocarcinoma: A pilot prospective randomized trial (UMIN00004108)                                                                     | 39   | Complications necessitating readmission after discharge                                   | Postoperative Misc endpoint          | Adjuvant                          | 31677701  |
| Effects of medical nutrition therapy compared with general nutritional advice on nutritional status and nutrition-related complications in esophageal cancer patients receiving concurrent chemoradiation: A randomized controlled trial | 100  | Nutritional status measured by PG-SGA                                                     | Non-standard Quality of Life         | Adjuvant                          | Not found |
| Perioperative standard oral nutrition supplements versus immunonutrition in patients undergoing colorectal resection in an Enhanced Recovery (ERAS) protocol                                                                             | 244  | Overall postoperative 30-day morbidity rate                                               | Postoperative Misc endpoint          | Adjuvant                          | Not found |
| Multicenter, phase III trial comparing selenium supplementation with observation in gynecologic radiation oncology: Follow-up analysis of the survival data 6 years after cessation of randomization                                     | 81   | Efficiency of selenium supplementation                                                    | Compliance/Adherence/Feasibility     | Adjuvant                          | 25015649  |
| Effects of dietary supplements of pediture and carnitine on the anthropometric indices in children with acute lymphoblastic leukemia under chemotherapy, in Afzalipour Hospital, Kerman, Iran                                            | 34   | Anthropometric indices                                                                    | Weight/Composition/Muscle            | Adjuvant                          | Not found |
| Impact of nutritional supplementation on treatment delay and morbidity in patients with head and neck tumors treated with irradiation                                                                                                    | 23   | Body weight and tricep skin-fold thickness                                                | Weight/Composition/Muscle            | Adjuvant                          | 1562782   |
| Parenteral nutrition effects of Omega-3 fatty acids on C-reactive protein, high-density lipoprotein, lymphocyte characteristics and the treatment of critically ill patients                                                             | 80   | C-reactive protein, HDL, and lymphocyte characteristics                                   | Translational/Basic Science Endpoint | Misc/Mixed                        | 32538747  |
| Effects of branched-chain amino acid supplementation after radiofrequency ablation for hepatocellular carcinoma: A randomized trial                                                                                                      | 51   | Time until distant recurrence of HCC                                                      | Cancer measurement                   | Adjuvant                          | 27908546  |
| Prostatic concentration of soy isoflavone exceeds serum after dietary supplementation                                                                                                                                                    | 25   | Tissue and serum isoflavone concentration                                                 | Translational/Basic Science Endpoint | Adjuvant                          |           |
| L-Alanin-L-Glutamine supplementation improves the outcome after colorectal surgery for cancer                                                                                                                                            | 109  | Postoperative complications                                                               | Postoperative Misc endpoint          | Adjuvant                          | 17573745  |
| Oral supplementation with carbohydrate- and branched-chain amino acid-enriched nutrients improves postoperative quality of life in patients undergoing hepatic resection                                                                 | 76   | Postoperative QoL using short-form 36 (SF-36) health questionnaire                        | Quality of Life                      | Adjuvant                          | 20852905  |
| Attenuation of the systemic inflammatory response and infectious complications after gastrectomy with preoperative oral arginine and ω-3 fatty acids supplemented immunonutrition                                                        | 60   | Postoperative outcome                                                                     | Postoperative Misc endpoint          | Adjuvant                          | 19629583  |
| Nutritional behaviour and quality of life during oncological polychemotherapy: Results of a prospective study on the efficacy of oral nutrition therapy in patients with acute leukaemia                                                 | 29   | Percentage of patients with initial nutritional status before antineoplastic therapy      | Weight/Composition/Muscle            | Adjuvant                          | 1425861   |
| Nutritional supplementation with an immuneenhancing formula in the patients with esophageal cancer                                                                                                                                       | 97   | CD3 lymph(%), CD4 lymph(%), CD8 lymph(%), and CD4/CD8 ratio                               | Translational/Basic Science Endpoint | Adjuvant                          | Not found |
| Dramatic dietary fat reduction is feasible for breast cancer patients: Results of the randomised study, WINS (UK) - stage 1                                                                                                              | 190  | Fat intake reduction                                                                      | Compliance/Adherence/Feasibility     | Secondary prevention/survivorship | 21868187  |
| The Men's Eating and Living (MEAL) Study: A Cancer and Leukemia Group B Pilot Trial of Dietary Intervention for the Treatment of Prostate Cancer                                                                                         | 74   | Differences in dietary intakes and plasma carotenoid concentrations                       | Translational/Basic Science Endpoint | Misc/Mixed                        | Not found |
| A randomized pilot trial of dietary modification for the chemoprevention of noninvasive bladder cancer: The Dietary Intervention in Bladder Cancer Study                                                                                 | 48   | Changes in dietary biomarkers (alpha-carotene and urinary isothiocyanates)                | Translational/Basic Science Endpoint | Secondary prevention/survivorship | 23867158  |
| Effect of a Behavioral Intervention to Increase Vegetable Consumption on Cancer Progression Among Men With Early-Stage Prostate Cancer: The MEAL Randomized Clinical Trial                                                               | 478  | Time to progression measured by PSA                                                       | Cancer measurement                   | Secondary prevention/survivorship | 32586177  |
| A randomized study of nutritional support in patients with colorectal and gastric cancer                                                                                                                                                 | 137  | QoL (EORTC-QLQ C-30)                                                                      | Quality of Life                      | Misc/Mixed                        | 12235650  |
| Effects of a dietary intervention on acute gastrointestinal side effects and other aspects of health-related quality of life: A randomized controlled trial in prostate cancer patients undergoing radiotherapy                          | 130  | EORTC QLQ-C30 and QLQ-PR25                                                                | Quality of Life                      | Adjuvant                          | 22633817  |
| Shrinking preoperative fast time with maltodextrin and protein hydrolysate in gastrointestinal resections due to cancer                                                                                                                  | 22   | Postoperative hospital length of stay                                                     | Postoperative Misc endpoint          | Adjuvant                          | 23759267  |
| Influence of a diet very high in vegetables, fruit, and fiber and low in fat on prognosis following treatment for breast cancer: the Women's Healthy Eating and Living (WHEL) randomized trial                                           | 3088 | Invasive breast cancer recurrence or new primary breast cancer and death due to any cause | Cancer measurement                   | Secondary prevention/survivorship | 17635889  |
| Long-term oral branched chain amino acids in patients undergoing chemoembolization for hepatocellular carcinoma: A randomized trial                                                                                                      | 84   | Post-TACE morbidity                                                                       | Non-standard Quality of Life         | Adjuvant                          | 15043519  |
| Nutritional counseling in patients with head, neck and esophagus cancer in (chemo)radiotherapy                                                                                                                                           | 29   | Weight loss                                                                               | Weight/Composition/Muscle            | Adjuvant                          | Not found |
| Randomized trial of the effects of individual nutritional counseling in cancer patients                                                                                                                                                  | 61   | Reduced weight loss                                                                       | Weight/Composition/Muscle            | Adjuvant                          | 24269077  |
| Efficacy of ready-to-use therapeutic food in malnourished children with cancer: Results of a randomized, open-label phase 3 trial                                                                                                        | 260  | Weight gain >10% at 6 weeks                                                               | Weight/Composition/Muscle            | Cachexia/malnutrition             | 34212474  |
| Postoperative early enteral nutrition therapy with long peptide mixture for gastric cancer patients: A clinical control study                                                                                                            | 70   | Recovery time of intestinal peristalsis and ventilation time                              | Postoperative Misc endpoint          | Adjuvant                          | Not found |
| Effect of whole-course nutrition management on patients with esophageal cancer undergoing concurrent chemoradiotherapy: A randomized control trial                                                                                       | 96   | Nutritional status via PG-SGA & BMI                                                       | Weight/Composition/Muscle            | Adjuvant                          | 31526964  |
| Neutropenic versus regular diet for acute leukaemia induction chemotherapy: randomised controlled trial                                                                                                                                  | 200  | Infection rate                                                                            | Non-standard Quality of Life         | Adjuvant                          | 35803707  |

|                                                                                                                                                                                                                       |     |                                                                                   |                                      |                                   |           |
|-----------------------------------------------------------------------------------------------------------------------------------------------------------------------------------------------------------------------|-----|-----------------------------------------------------------------------------------|--------------------------------------|-----------------------------------|-----------|
| Association between amino acids, biomarkers of prostate cancer and inflammation in norwegian prostate cancer patients                                                                                                 | 74  | PSA                                                                               | Cancer measurement                   | Adjuvant                          | Not found |
| Individualized nutrition intervention is of major benefit to colorectal cancer patients: Long-term follow-up of a randomized controlled trial of nutritional therapy                                                  | 111 | Body weight                                                                       | Weight/Composition/Muscle            | Adjuvant                          | 23134880  |
| Effect of a specific supplement enriched with n-3 polyunsaturated fatty acids on markers of inflammation, oxidativestress and metabolic status of ear, nose and throat cancer patients                                | 26  | Inflammation, oxidative stress, and metabolic status (total antioxidant capacity) | Translational/Basic Science Endpoint | Adjuvant                          | Not found |
| Effect of Early Peripheral Parenteral Nutrition Support in an Enhanced Recovery Program for Colorectal Cancer Surgery: A Randomized Open Trial                                                                        | 158 | Incidence of postoperative complications (morbidity and mortality for 30 days )   | Postoperative Misc endpoint          | Adjuvant                          | Not found |
| Effects of an oral nutritional supplement containing eicosapentaenoic acid on nutritional and clinical outcomes in patients with advanced non-small cell lung cancer: randomised trial                                | 112 | Weight, body composition, dietary intake, inflammatory parameters, HRQL           | Weight/Composition/Muscle            | Palliative                        | 24746976  |
| Effects of a Plant-Based High-Protein Diet on Fatigue in Breast Cancer Patients Undergoing Adjuvant Chemotherapy—a Randomized Controlled Trial                                                                        | 103 | Self reported CRF which was assessed using the Fatigue Symptom Inventory          | Non-standard Quality of Life         | Adjuvant                          | 36546552  |
| Randomized, double-blind, controlled study of glycyl-L-glutamine-dipeptide in the parenteral nutrition of patients with acute leukemia undergoing intensive chemotherapy                                              | 30  | Duration of neutropenic fever as a proportion of neutropenia                      | Non-standard Quality of Life         | Adjuvant                          | 14990264  |
| Randomized, double-blind, placebo-controlled crossover study in men with prostate cancer and rising PSA: Effectiveness of a dietary supplement                                                                        | 49  | Rate of increase of PSA                                                           | Cancer measurement                   | Misc/Mixed                        | 16263208  |
| Effects of an exercise and hypocaloric healthy eating program on biomarkers associated with long-term prognosis after early-stage breast cancer: A randomized controlled trial                                        | 90  | Change in body weight and composition                                             | Weight/Composition/Muscle            | Secondary prevention/survivorship | 23184120  |
| Effect of a Perioperative Nutritional Supplementation with Oral Impact® in Patients undergoing Hepatic Surgery for Liver Cancer: A Prospective, Placebo-Controlled, Randomized, Double-Blind Study                    | 35  | Factor V, 3 days after surgery                                                    | Translational/Basic Science Endpoint | Adjuvant                          | 27007018  |
| Preoperative oral supplementation with long-chain Ω-3 fatty acids beneficially alters phospholipid fatty acid patterns in liver, gut mucosa, and tumor tissue                                                         | 40  | EPA and DHA in liver tissue, gut mucosa, and tumor tissue                         | Translational/Basic Science Endpoint | Adjuvant                          | 15961678  |
| Comprehensive Diet and Exercise Intervention During Radiation Therapy Can Improve Metabolic and Inflammatory Markers in Breast Cancer Patients                                                                        | 43  | Positive influence on body composition, HbA1C, adiponectin, leptin, and insulin   | Translational/Basic Science Endpoint | Adjuvant                          | Not found |
| To compare outcome of Intensive nutritional support with standard practise in head and neck cancer                                                                                                                    | 60  | Protein and kilocalorie intake                                                    | Weight/Composition/Muscle            | Adjuvant                          | Not found |
| Chinese food therapy combined with chemotherapy in the treatment of advanced ovarian cancer based on                                                                                                                  | 74  | Treatment quality of life                                                         | Non-standard Quality of Life         | Adjuvant                          | Not found |
| Randomized controlled trial comparing a low-fat diet with a weight-reduction diet in breast cancer-related lymphedema                                                                                                 | 51  | Arm volume at 24 weeks                                                            | Weight/Composition/Muscle            | Misc/Mixed                        | 17393377  |
| Application of the Diet and Nutrition Management System in the Nutrition Management of Tumor Patients Treated with Chemotherapy                                                                                       | 86  | Awareness rate of disease knowledge                                               | Non-standard Quality of Life         | Misc/Mixed                        | Not found |
| Influence of nutritional support on tolerability and results of treatment in patients with newly diagnosed hemoblastoses received program chemotherapy                                                                | 40  | Serum albumin and frequency of constipation                                       | Translational/Basic Science Endpoint | Adjuvant                          | Not found |
| Effect of early nutritional support on the clinical efficacy of gastrointestinal cancer patients                                                                                                                      | 80  | Nutritional status                                                                | Weight/Composition/Muscle            | Adjuvant                          | Not found |
| Phase II randomized controlled trial (RCT) of medical intensive nutrition therapy (MINT) to improve chemotherapy (CT) tolerability in malnourished patients with solid tumor malignancies                             | 186 | Chemotherapeutic associated toxicity                                              | Non-standard Quality of Life         | Cachexia/malnutrition             | Not found |
| Potential benefits of early nutritional intervention in adults with upper gastrointestinal cancer: a pilot randomised trial                                                                                           | 21  | Quality of Life (EORTC QLQ-C30)                                                   | Quality of Life                      | Adjuvant                          | Not found |
| Anorexia-cachexia syndrome in cancer patients: Pathogenetic aspects and treatment options                                                                                                                             | 96  | Reduction in weight loss                                                          | Weight/Composition/Muscle            | Adjuvant                          | Not found |
| Reduced postoperative infections with an immune-enhancing nutritional supplement                                                                                                                                      | 124 | LOS (excluding rehabilitation stay)                                               | Postoperative Misc endpoint          | Adjuvant                          | 10369282  |
| Randomised controlled trial of one week strict low-iodine diet versus one week non-specified low iodine diet in differentiated thyroid carcinoma                                                                      | 104 | Urinary iodine level                                                              | Translational/Basic Science Endpoint | Adjuvant                          | Not found |
| Rapid Incorporation of ω-3 Fatty Acids into Colonic Tissue after Oral Supplementation in Patients with Colorectal Cancer: A Randomized, Placebo-Controlled Intervention Trial                                         | 148 | Colonic wall content of EPA, docosapentaenoic acid (DPA-3), and DHA               | Translational/Basic Science Endpoint | Adjuvant                          | 23788002  |
| Effect of a leucine-rich supplement in combination with nutrition and physical exercise in advanced cancer patients: A randomized controlled intervention trial                                                       | 52  | Short physical performance battery                                                | Non-standard Quality of Life         | Palliative                        | 32340904  |
| Effect of targeted nutrition intervention on defecation and postoperative complications in patients undergoing radical resection for rectal cancer                                                                    | 130 | Defecation function                                                               | Non-standard Quality of Life         | Adjuvant                          | Not found |
| A randomized, double blind comparative study of prophylactic parenteral nutritional support with or without glutamine in autologous stem cell transplantation for hematological malignancies - Three years' follow-up | 44  | Overall survival                                                                  | Overall Survival                     | Adjuvant                          | 16284692  |
| Randomized Controlled Trial Investigating Perioperative Immunonutrition for Patients Undergoing Cytoreductive Surgery (CRS) and Hyperthermic Intraperitoneal Chemotherapy (HIPEC)                                     | 62  | Length of hospitalization stay                                                    | Postoperative Misc endpoint          | Adjuvant                          | 36394687  |



|                                                                                                                                                                                                                                     |     |                                                                                                                             |                                      |                                   |           |
|-------------------------------------------------------------------------------------------------------------------------------------------------------------------------------------------------------------------------------------|-----|-----------------------------------------------------------------------------------------------------------------------------|--------------------------------------|-----------------------------------|-----------|
| Effect of different nutritional support modes on humoral immunity and outcomes after esophagectomy                                                                                                                                  | 46  | Infection-related complications and hospital stay                                                                           | Postoperative Misc endpoint          | Adjuvant                          | Not found |
| Evolution of inflammatory markers in patients with advanced head and neck carcinoma with prophylactic percutaneous gastrostomy                                                                                                      | 38  | Inflammatory profile (markers)                                                                                              | Translational/Basic Science Endpoint | Adjuvant                          | Not found |
| Preoperative nutritional support for patients undergoing elective colorectal cancer surgery - does it really work?                                                                                                                  | 120 | Changes in muscle strength, muscle mass, and self-sufficiency                                                               | Weight/Composition/Muscle            | Adjuvant                          | 35258042  |
| A double blind, placebo controlled randomised trial (RCT) evaluating the effect of a polyphenol rich whole food supplement on PSA progression in men                                                                                | 203 | Median rise in PSA                                                                                                          | Cancer measurement                   | Adjuvant                          | Not found |
| Longitudinal changes in body weight and body composition among women previously treated for breast cancer consuming a high-vegetable, fruit and fiber, low-fat diet                                                                 | 77  | Longitudinal changes in intake, body weight, waist:hip ratio, BMI, and body composition                                     | Weight/Composition/Muscle            | Secondary prevention/survivorship | 15309460  |
| beta-carotene supplementation in patients radically treated for stage I-II head and neck cancer: results of a randomized trial                                                                                                      | 214 | Survival and disease-free survival                                                                                          | Overall Survival                     | Adjuvant                          | 14534715  |
| Transcriptional changes in prostate of men on active surveillance after a 12-mo glucoraphanin-rich broccoli intervention-results from the Effect of Sulforaphane on Prostate Cancer PrEvention (ESCAPE) randomized controlled trial | 61  | Changes in gene expression                                                                                                  | Translational/Basic Science Endpoint | Secondary prevention/survivorship | 30982861  |
| Oral administration of the amino acids cystine and theanine attenuates the adverse events of S-1 adjuvant chemotherapy in gastrointestinal cancer patients                                                                          | 70  | Adverse effects with S-1 adjuvant chemotherapy                                                                              | Non-standard Quality of Life         | Adjuvant                          | 27306219  |
| Perioperative immunonutrition in well-nourished patients undergoing surgery for head and neck cancer: Evaluation of inflammatory and immunologic outcomes                                                                           | 8   | Postoperative immune and inflammatory status (C-reactive protein, total lymphocytes, CD3, CD4, CD8, immunoglobulin G, etc.) | Translational/Basic Science Endpoint | Adjuvant                          | 23571650  |
| Glutamine-enriched nutrition does not reduce mucosal morbidity or complications after stem-cell transplantation for childhood malignancies: A prospective randomized study                                                          | 120 | Mucositis                                                                                                                   | Non-standard Quality of Life         | Adjuvant                          | 21499196  |
| Influence of a nutritional intervention on dietary intake and quality of life in cancer patients: A randomized controlled trial                                                                                                     | 58  | QoL and dietary intake                                                                                                      | Quality of Life                      | Misc/Mixed                        | 24103511  |
| Effects of nutrition and physical exercise intervention in palliative cancer patients: A randomized controlled trial                                                                                                                | 58  | QoL (EORTC-QLQ C-30)                                                                                                        | Quality of Life                      | Palliative                        | 28651827  |
| Calorie restriction and synbiotics effect on quality of life and edema reduction in breast cancer-related lymphedema, a clinical trial                                                                                              | 135 | Differences in quality of life score (Lymphedema Life Impact Scale)                                                         | Non-standard Quality of Life         | Misc/Mixed                        | 32898787  |
| Randomized phase 2 study of gemcitabine and cisplatin with or without vitamin supplementation in patients with advanced esophagogastric cancer                                                                                      | 82  | Response rate                                                                                                               | Cancer measurement                   | Palliative                        | 29696360  |
| Immunonutrition improves functional capacities in head and neck and esophageal cancer patients undergoing radiochemotherapy: A randomized clinical trial                                                                            | 37  | Functional outcomes                                                                                                         | Non-standard Quality of Life         | Adjuvant                          | 23849811  |
| Preventing weight gain during adjuvant chemotherapy for breast cancer: A dietary intervention study                                                                                                                                 | 96  | Anthropometric changes                                                                                                      | Weight/Composition/Muscle            | Adjuvant                          | 22869285  |
| ERGO2: A prospective randomized trial of a 9-day schedule of calorically restricted ketogenic diet and fasting or standard diet in addition to re-irradiation for malignant glioma                                                  | 50  | Progression free survival rate                                                                                              | Cancer measurement                   | Adjuvant                          | 32619561  |
| Effect of glutamine-enriched nutritional support on intestinal mucosal barrier function, MMP-2, MMP-9 and immune function in patients with advanced gastric cancer during perioperative chemotherapy                                | 94  | Lactulose/mannitol ratio, D-lactate levels, MMP-9, MMP-2, CD3+, CD4+, CD8+, CD4+/CD8+, and immunoglobulins                  | Translational/Basic Science Endpoint | Adjuvant                          | 28927119  |
| Effects of glutamine on plasma endotoxin and immune function in postoperative patients with laryngeal carcinoma                                                                                                                     | 39  | Plasma endotoxin level and immune function                                                                                  | Translational/Basic Science Endpoint | Adjuvant                          | Not found |
| Clinical trial: Efficacy of a low or modified fat diet for the prevention of gastrointestinal toxicity in patients receiving radiotherapy treatment for pelvic malignancies                                                         | 117 | Difference in change in Inflammatory Bowel Disease Questionnaire – Bowel (IBDQ-B) score                                     | Non-standard Quality of Life         | Adjuvant                          | 22515941  |
| High fibre diet, low fibre diet or habitual diet for the prevention of radiation-induced toxicity in pelvic cancer: A multi-centre randomised controlled trial                                                                      | 166 | Change in Inflammatory Bowel Disease Questionnaire – Bowel Subset (IBDQ-B) score                                            | Non-standard Quality of Life         | Adjuvant                          | Not found |
| Dietary supplementation with n-3-fatty acids in patients with pancreatic cancer and cachexia: marine phospholipids versus fish oil - a randomized controlled double-blind trial                                                     | 60  | Change of weight and appetite                                                                                               | Weight/Composition/Muscle            | Misc/Mixed                        | 28578704  |
| Effects of Perioperative Oral Nutrition Supplementation in Malaysian Patients Undergoing Elective Surgery for Breast and Colorectal Cancers—A Randomised Controlled Trial                                                           | 91  | Body weight, BMI, and serum albumin level                                                                                   | Weight/Composition/Muscle            | Adjuvant                          | 35276977  |
| A study of caloric restriction versus standard diet in overweight men with newly diagnosed prostate cancer: A randomized controlled trial                                                                                           | 19  | Changes in weight                                                                                                           | Weight/Composition/Muscle            | Adjuvant                          | 23775525  |
| A randomized controlled trial of postoperative artificial nutrition in malnourished patients with gastrointestinal cancer                                                                                                           | 646 | Postoperative complications, mortality, and postoperative length of hospital stay                                           | Postoperative Misc endpoint          | Adjuvant                          | 18000777  |

|                                                                                                                                                                                                                                     |     |                                                                                                                            |                                      |          |           |
|-------------------------------------------------------------------------------------------------------------------------------------------------------------------------------------------------------------------------------------|-----|----------------------------------------------------------------------------------------------------------------------------|--------------------------------------|----------|-----------|
| Preoperative enteral immunonutrition improves postoperative outcome in patients with gastrointestinal cancer                                                                                                                        | 60  | Postoperative serum antibody and complement levels                                                                         | Translational/Basic Science Endpoint | Adjuvant | 16830214  |
| Effect of a nutritional therapy using a late evening snack for hepatocellular carcinoma                                                                                                                                             | 23  | Blood biochemical data, nutrition status using an indirect calorimeter, and area under the concentration curve for glucose | Translational/Basic Science Endpoint | Adjuvant | Not found |
| Impact of Enhanced Recovery after Surgery with Preoperative Whey Protein-Infused Carbohydrate Loading and Postoperative Early Oral Feeding among Surgical Gynecologic Cancer Patients: An Open-Labelled Randomized Controlled Trial | 118 | Length of postoperative hospital stay, clear fluid toleration, food toleration, and bowel function return                  | Postoperative Misc endpoint          | Adjuvant | 31968595  |
| Impact of perioperative enteral immunonutrition in patients with gastrointestinal cancer undergoing elective surgery: a randomized controlled trial                                                                                 | 202 | Nutritional status (weight loss and prealbumin) and functional capacities                                                  | Weight/Composition/Muscle            | Adjuvant | Not found |
| Effect of Qihuang Decoction Combined with Enteral Nutrition on Postoperative Gastric Cancer of Nutrition and Immune Function                                                                                                        | 237 | Blood markers of nutrition and immune function                                                                             | Translational/Basic Science Endpoint | Adjuvant | 32215032  |
| Impact of hypocaloric and hyponitrogenic parenteral nutrition on clinical outcome in postoperative patients: A multi-center randomized controlled trial of 120 cases                                                                | 120 | Postoperative outcomes                                                                                                     | Postoperative Misc endpoint          | Adjuvant | 17919374  |
| Roles of clinical pharmacists in nutritional therapy for gastric cancer patients treated with neoadjuvant chemotherapy                                                                                                              | 60  | Nutritional status and incidence of adverse reactions                                                                      | Non-standard Quality of Life         | Adjuvant | Not found |
| Effect of postoperative precision nutrition therapy on postoperative recovery for advanced gastric cancer after neoadjuvant chemotherapy                                                                                            | 71  | Postoperative nutritional status                                                                                           | Postoperative Misc endpoint          | Adjuvant | Not found |
| Nutritional support of pediatric patients with cancer consuming an enteral formula with fructooligosaccharides                                                                                                                      | 67  | Stool microbiota (enterobacteria, bifidobacteria, lactobacillus, and clostridium perfringens in stool cultures)            | Translational/Basic Science Endpoint | Adjuvant | Not found |
| Effect of oral nutritional supplementation on the post-discharge nutritional status and quality of life of gastrointestinal cancer patients after surgery: a multi-center study                                                     | 114 | Postoperative nutritional status and anthropometric measures                                                               | Weight/Composition/Muscle            | Adjuvant | 31464391  |
| Improvement of constipation in leukemia patients undergoing chemotherapy using sweet potato                                                                                                                                         | 120 | Constipation                                                                                                               | Non-standard Quality of Life         | Adjuvant | 25881813  |

## Supplementary Table 2

The following table describes the dietary interventions used in RCTs for cancer patients with assigned dietary categorization.

| Title                                                                                                                                                                                                                       | Author                    | Dietary Intervention                                               | Dietary Categorization      | PubMed ID |
|-----------------------------------------------------------------------------------------------------------------------------------------------------------------------------------------------------------------------------|---------------------------|--------------------------------------------------------------------|-----------------------------|-----------|
| Lack of effect of a high-fiber cereal supplement on the recurrence of colorectal adenomas                                                                                                                                   | Alberts et al.            | High fiber diet (13.5 g wheat bran fiber per day)                  | Fiber modified diet         | 10770890  |
| Impact of Preoperative Acetaminophen and Carbohydrate Loading on Pain and Functional Status in Patients Undergoing Mohs Micrographic Surgery for Nonmelanoma Skin Cancers                                                   | Aleisa et al.             | Preoperative carbohydrate loading and acetaminophen                | Energy modified diet        | 31725692  |
| Oral nutritional supplement (ONS) reduced weight loss and optimised preoperative energy and nutrient intakes in colorectal cancer patients undergoing surgery                                                               | Ali et al.                | Oral nutritional supplements                                       | Nutrient modified diet      | Not found |
| A Translational Randomized Trial of Perioperative Arginine Immunonutrition on Natural Killer Cell Function in Colorectal Cancer Surgery Patients                                                                            | Angka et al.              | Arginine enriched supplements                                      | Nutrient modified diet      | 35913670  |
| Vitamin D Supplementation and Survival in Metastatic Colorectal Cancer                                                                                                                                                      | Antunac et al.            | Vitamin D supplementation                                          | Nutrient modified diet      | 29533115  |
| Effects of perioperative Eicosapentaenoic acid-enriched oral nutritional supplement on lean body mass after total gastrectomy for gastric cancer                                                                            | Aoyama et al.             | Eicosapentaenoic acid-enriched oral nutrition                      | Nutrient modified diet      | 30854113  |
| Efficacy of $\omega$ -3 supplementation on nutritional status, skeletal muscle, and chemoradiotherapy toxicity in cervical cancer patients: A randomized, triple-blind, clinical trial conducted in a middle-income country | Aredes et al.             | Omega-3 supplementation                                            | Nutrient modified diet      | Not found |
| Effects of a parallel-arm randomized controlled weight loss pilot study on biological and psychosocial parameters of overweight and obese breast cancer survivors                                                           | Arikawa et al.            | Caloric deficit (1000 kcal deficit) and exercise intervention      | Energy modified diet        | 28702218  |
| Phase II prospective randomized trial of a low-fat diet with fish oil supplementation in men undergoing radical prostatectomy                                                                                               | Aronson et al.            | Low-fat diet and fish oil supplementation                          | Energy modified diet        | 22027686  |
| Randomized study to compare the compliance of two prescription of nutritional supplementation in oncology inpatients                                                                                                        | Arribas et al.            | Nutritional supplementation - 600 kcal and 25 g protein per day    | Energy modified diet        | Not found |
| The Impact of a Ketogenic Dietary Intervention on the Quality of Life of Stage II and III Cancer Patients: A Randomized Controlled Trial in the Caribbean                                                                   | Augustus et al.           | Modified ketogenic diet                                            | Energy modified diet        | 32791011  |
| Mediterranean-style dietary pattern improves cancer-related fatigue and quality of life in men with prostate cancer treated with androgen deprivation therapy: A pilot randomised control trial                             | Baguley et al.            | Mediterranean diet                                                 | Mediterranean diet          | 35565100  |
| The impact of a mediterranean-style dietary pattern on cancer-related fatigue and quality of life in men with prostate cancer treated with androgen deprivation therapy: A pilot study                                      | Baguley et al.            | Mediterranean diet                                                 | Mediterranean diet          | Not found |
| Simple nutritional intervention in patients with advanced cancers of the gastrointestinal tract, non-small cell lung cancers or mesothelioma and weight loss receiving chemotherapy: a randomised controlled trial          | Baldwin et al.            | Nutritional supplementation and diet (additional 600 kcal per day) | Energy modified diet        | 21733143  |
| The effect of perioperative immunonutrition on surgical complications and quality of life in patients with head and neck cancer                                                                                             | Basmisirlı et al.         | Immunonutrient modified entereal formula                           | Nutrition support           | Not found |
| The effects of short-term fasting on quality of life and tolerance to chemotherapy in patients with breast and ovarian cancer: A randomized cross-over pilot study                                                          | Bauersfeld et al.         | Short term fasting (max 350 kcal)                                  | Energy modified diet        | 29699509  |
| The use of a protein and energy dense eicosapentaenoic acid containing supplement for malignancy-related weight loss in children                                                                                            | Bayram et al.             | Protein and energy dense eicosapentaenoic acid                     | Nutrient modified diet      | 19090549  |
| Comparing diets for weight loss and improvement in biomarkers in men with prostate cancer on surveillance: A pilot study                                                                                                    | Benson et al.             | Plant based olive oil diet                                         | Restrictive eating patterns | Not found |
| Influence of dietary factors on actinically-induced skin cancer                                                                                                                                                             | Black et al.              | Low-fat diet                                                       | Energy modified diet        | 9920444   |
| A double-blind phase III trial of immunomodulating nutritional formula during adjuvant chemoradiotherapy in head and neck cancer patients: IMPATOX                                                                          | Boisselier et al.         | Immunomodulating arginine/omega-3 supplements                      | Nutrient modified diet      | 32936874  |
| Effect of soy protein isolate supplementation on biochemical recurrence of prostate cancer after radical prostatectomy: A randomized trial                                                                                  | Bosland et al.            | Soy protein isolate supplements                                    | Energy modified diet        | 33764851  |
| Modification of the response to chemotherapy of HER2 negative metastatic breast cancer by lipids of marine origin: A controlled, randomized, double blind dietary supplementation trial                                     | Bougnoux et al.           | Supplement long chain PUFA of marine origin                        | Energy modified diet        | Not found |
| Nutritional advice in older patients at risk of malnutrition during treatment for chemotherapy: a two-year randomized controlled trial                                                                                      | Bourdel-Marchasson et al. | Diet counselling increasing calorie and protein intake             | Energy modified diet        | 25265392  |
| Glutamine supplementation in cancer patients receiving chemotherapy: A double-blind randomized study                                                                                                                        | Bozzetti et al.           | Glutamine supplementation                                          | Nutrient modified diet      | 9263281   |

|                                                                                                                                                                                                                                             |                      |                                                                      |                             |           |
|---------------------------------------------------------------------------------------------------------------------------------------------------------------------------------------------------------------------------------------------|----------------------|----------------------------------------------------------------------|-----------------------------|-----------|
| Preoperative oral arginine and n-3 fatty acid supplementation improves the immunometabolic host response and outcome after colorectal resection for cancer                                                                                  | Braga et al.         | Preoperative oral arginine and n3 fatty acid supplements             | Nutrient modified diet      | 12464864  |
| Immune and nutritional effects of early enteral nutrition after major abdominal operations                                                                                                                                                  | Braga et al.         | Immunonutrition enteral feeding supplementation                      | Nutrition support           | 8639722   |
| Effect of fish oil on appetite and other symptoms in patients with advanced cancer and anorexia/cachexia: a double-blind, placebo-controlled study                                                                                          | Bruera et al.        | Fish oil supplementation                                             | Nutrient modified diet      | 12506181  |
| Whey Protein Supplementation Improves Nutritional Status, Glutathione Levels, and Immune Function in Cancer Patients: A Randomized, Double-Blind Controlled Trial                                                                           | Bumrungper t et al.  | Whey protein isolates with zinc and selenium supplementation         | Nutrient modified diet      | 29565716  |
| Monitoring dietary change in a low-fat diet intervention study: advantages of using 24-hour dietary recalls vs food records                                                                                                                 | Buzzard et al.       | Low-fat diet                                                         | Energy modified diet        | Not found |
| The influence of low fat, low lactose diet on diarrhoea during pelvic radiotherapy                                                                                                                                                          | Bye et al.           | Low-fat and low-lactose diet                                         | Energy modified diet        | 7900512   |
| The impact of preoperative immunonutrition and other nutrition models on tumor infiltrative lymphocytes in colorectal cancer patients                                                                                                       | Caglayan et al.      | Immunomodulating supplementation                                     | Nutrient modified diet      | 23010614  |
| A Whole-Food, Plant-Based (WFPB) dietary intervention to improve outcomes in patients with metastatic breast cancer                                                                                                                         | Campbell et al.      | Whole food plant-based diet                                          | Restrictive eating patterns | 38045318  |
| A Dietary Intervention for Recurrent Prostate Cancer After Definitive Primary Treatment: Results of a Randomized Pilot Trial                                                                                                                | Camrody et al.       | Dietary classes emphasizing a plant-based diet, fish, and vegetables | Nutrition counseling        | 18400281  |
| Effect of Nutritional Supplementation Enriched with Eicosapentaenoic Acid on Inflammatory Profile of Patients With Oral Cavity Cancer in Antineoplastic Pretreatment: A Controlled and Randomized Clinical Trial                            | Carvalho et al.      | Eicosapentaenoic acid supplementation                                | Nutrient modified diet      | 28128983  |
| Pancreatic enzyme supplementation after gastrectomy for gastric cancer: a randomized controlled trial                                                                                                                                       | Catarci et al.       | Pancreatic enzyme supplementation                                    | Nutrient modified diet      | 28804801  |
| Social cognitive outcomes are associated with improvements in mobility performance following lifestyle intervention in prostate cancer patients undergoing androgen deprivation therapy                                                     | Chaplow et al.       | Exercise and dietary intervention                                    | Nutrition counseling        | 35085341  |
| Role of enteral immunonutrition in patients with gastric carcinoma undergoing major surgery                                                                                                                                                 | Chen et al.          | Enteral immunonutrition                                              | Nutrient modified diet      | 15851366  |
| Effects of Five-Step Nutritional Interventions Conducted by a Multidisciplinary Care Team on Gastroenteric Cancer Patients Undergoing Chemotherapy: A Randomized Clinical Trial                                                             | Chen et al.          | Five step nutritional intervention on nutritional education          | Nutrition counseling        | 35903847  |
| A Phase 3 Randomized Trial of Nicotinamide for Skin-Cancer Chemoprevention                                                                                                                                                                  | Chen et al.          | 500 mg of nicotinamide twice daily                                   | Nutrient modified diet      | 26488693  |
| The influence of low-carbohydrate diets on the metabolic response to androgen-deprivation therapy in prostate cancer                                                                                                                        | Chi et al.           | Low-carbohydrate diet                                                | Energy modified diet        | 33949711  |
| Arginine, glutamine, and fish oil supplementation in cancer patients treated with concurrent chemoradiotherapy: A randomized control study                                                                                                  | Chitapanaru x et al. | Enteral arginine, glutamine, and fish oil supplements                | Nutrient modified diet      | 31146957  |
| Dietary fat reduction in postmenopausal women with primary breast cancer: Phase III Women's Intervention Nutrition Study (WINS)                                                                                                             | Chlebowski et al.    | Low-fat diet                                                         | Energy modified diet        | Not found |
| Effects of Single Nucleotide Polymorphisms and Mediterranean Diet in Overweight or Obese Postmenopausal Women With Breast Cancer Receiving Adjuvant Hormone Therapy: A Pilot Randomized Controlled Trial                                    | Cho et al.           | Mediterranean diet                                                   | Mediterranean diet          | 35845810  |
| Preoperative Immunonutrition in Liver Resection for Cancer: Results of the PROPILS Trial, a Multicenter Randomized Controlled Phase IV Trial                                                                                                | Ciacio et al.        | Preoperative oral immunonutrition                                    | Nutrient modified diet      | Not found |
| Changes in dietary habits of women with breast cancer: preliminary results of a randomized controlled trial                                                                                                                                 | Cioffi et al.        | Counseling based on mediterranean diet                               | Mediterranean diet          | Not found |
| A ketogenic diet reduces central obesity and serum insulin in women with ovarian or endometrial cancer                                                                                                                                      | Cohen et al.         | Ketogenic diet                                                       | Energy modified diet        | 30137481  |
| Effect of nutritional counseling combined with oral nutritional supplements on clinical outcome of esophageal cancer patients under radiotherapy treatment                                                                                  | Cong et al.          | Oral nutritional supplements                                         | Nutrient modified diet      | Not found |
| Impact of glutamine, eicosapntemacnioc acid, branched-chain amino acid supplements on nutritional status and treatment compliance of esophageal cancer patients on concurrent chemoradiotherapy and gastric cancer patients on chemotherapy | Cong et al.          | Glutamine, arginine, and BCAA supplements                            | Nutrient modified diet      | 26080850  |
| Effect of oral nutritional supplementation on nutritional status and quality of life in patients with gastric cancer after operation (23 cases RCT observations)                                                                            | Cui et al.           | Oral nutritional supplements                                         | Nutrient modified diet      | Not found |
| Enteral nutrition with supplemental arginine, RNA, and omega-3 fatty acids in patients after operation: Immunologic, metabolic, and clinical outcome                                                                                        | Daly et al.          | Arginine, RNA, and omega-3 fatty acids                               | Nutrient modified diet      | 1377838   |
| A Randomized Double-Blind Placebo-Controlled Trial of Fruit and Vegetable Concentrates on Intermediate Biomarkers in Head and Neck Cancer                                                                                                   | Datta et al.         | Fruit and vegetable concentrates                                     | Nutrient modified diet      | 28102098  |

|                                                                                                                                                                                           |                                |                                                                               |                             |           |
|-------------------------------------------------------------------------------------------------------------------------------------------------------------------------------------------|--------------------------------|-------------------------------------------------------------------------------|-----------------------------|-----------|
| Fish oil supplementation and inflammatory response during neoadjuvant chemoradiation for rectal cancer: Results from a prospective, randomized, controlled trial                          | De Aguiar pastore silva et al. | Fish oil supplementation                                                      | Nutrient modified diet      | Not found |
| Preoperative Fasting Abbreviation With Whey Protein Reduces the Occurrence of Postoperative Complications in Patients With Head and Neck Cancer: A Randomized Clinical Trial              | De carvalho et al.             | Whey protein                                                                  | Energy modified diet        | 33373478  |
| Fasting mimicking diet as an adjunct to neoadjuvant chemotherapy for breast cancer in the multicentre randomized phase 2 DIRECT trial                                                     | De groot et al.                | Energy modified diet (plant-based, low calorie, low amino acid substitution)  | Energy modified diet        | 32576828  |
| A randomized clinical trial with oral immunonutrition (ω3-enhanced formula vs. arginine-enhanced formula) in ambulatory head and neck cancer patients                                     | De luis et al.                 | Arginine enriched supplements                                                 | Nutrient modified diet      | 15802904  |
| Fish oil supplementation during chemotherapy increases posterior time to tumor progression in colorectal cancer                                                                           | De quadros carmargo et al.     | Fish oil supplementation                                                      | Nutrient modified diet      | 26700096  |
| Nutritional intervention contributes to the improvement of symptoms related to quality of life in breast cancer patients undergoing neoadjuvant chemotherapy: A randomized clinical trial | De souza et al.                | Personalized diet plan                                                        | Nutrition counseling        | Not found |
| Nutrition therapy in cachectic cancer patients. The Tight Caloric Control (TiCaCo) pilot trial                                                                                            | De waele et al.                | Patient-specific dietary program coached by dietitian                         | Nutrition counseling        | Not found |
| Nutrition therapy promotes overall survival in cachectic cancer patients through a biophysical pathway: the ticaconco trial                                                               | De waele et al.                | Intensive personalised dietary counseling                                     | Nutrition counseling        | Not found |
| Benefits of immunonutrition in patients with head and neck cancer receiving chemoradiation: A phase II randomized, double-blind study                                                     | Dechaphunkul et al.            | Immunonutrient supplements                                                    | Nutrient modified diet      | 35007812  |
| Results of a diet/exercise feasibility trial to prevent adverse body composition change in breast cancer patients on adjuvant chemotherapy                                                | Demark-Wahnefried et al.       | High fruit and vegetable, high calcium, low-fat diet along with exercise      | Nutrition counseling        | 18501061  |
| Flaxseed supplementation (not dietary fat restriction) reduces prostate cancer proliferation rates in men presurgery                                                                      | Demark-Wahnefried et al.       | Flaxseed supplementation                                                      | Nutrient modified diet      | 19064574  |
| Presurgical weight loss affects tumour traits and circulating biomarkers in men with prostate cancer                                                                                      | Demark-Wahnefried et al.       | Energy-restricted diet and exercise                                           | Energy modified diet        | 28881355  |
| Randomized trial of weight loss in primary breast cancer: Impact on body composition, circulating biomarkers and tumor characteristics                                                    | Demark-Wahnefried et al.       | Counseling for resistance training, caloric restriction, and aerobic exercise | Nutrition counseling        | 31442303  |
| Observation on application effect of TCM diet intervention in improving malnutrition in patients with end-stage liver cancer                                                              | Deng et al.                    | Traditional Chinese medicine dietary intervention                             | Restrictive eating patterns | Not found |
| Effects of a high dose, aglycone-rich soy extract on prostate-specific antigen and serum isoflavone concentrations in men with localized prostate cancer                                  | Devere white et al.            | High-dose isoflavone supplements                                              | Nutrient modified diet      | 21058191  |
| A Very-Low-Fat Vegan Diet Increases Intake of Protective Dietary Factors and Decreases Intake of Pathogenic Dietary Factors                                                               | Dewell et al.                  | Very low-fat vegan diet                                                       | Restrictive eating patterns | 18237581  |
| Effects of nutritional support in patients with colorectal cancer                                                                                                                         | Dintinjana et al.              | Dietary counseling, oral nutrition supplements, and megestrol acetate         | Nutrition counseling        | 18982745  |
| Effect of adequate nutrition therapy in rectal carcinoma post-surgery patients                                                                                                            | Djunet et al.                  | Adequate nutrition therapy                                                    | Nutrition counseling        | Not found |
| A diet and exercise intervention during Chemotherapy for breast cancer                                                                                                                    | Djuric et al.                  | Nutrition counseling emphasizing low-fat, high-fruit diet and exercise        | Energy modified diet        | 22238561  |
| In a randomized trial in prostate cancer patients, dietary protein restriction modifies markers of leptin and insulin signaling in plasma extracellular vesicles                          | Eitan et al.                   | Protein restricted diet                                                       | Energy modified diet        | Not found |
| Oral Nutritional Supplementation in Cancer Patients Who Were Receiving Chemo/Chemoradiation Therapy: A Multicenter, Randomized Phase II Study                                             | Faccio et al.                  | Oral nutritional supplement (whey protein isolated, leucin, and zinc)         | Nutrient modified diet      | 32363940  |
| Reduced infections with perioperative immunonutrition in head and neck cancer: Exploratory results of a multicenter, prospective, randomized, double-blind study                          | Falewee et al.                 | Preoperative or perioperative immunonutrition                                 | Nutrient modified diet      | 24182765  |
| Perioperative nutritional support in patients undergoing hepatectomy for hepatocellular carcinoma                                                                                         | Fan et al.                     | BCAA, dextrose, and lipid emulsion supplementation                            | Nutrition support           | 7969324   |
| Total parenteral alimentation with glutamine supplementation for the prevention of common complications in patients undergoing hematopoietic stem cell transplantation                    | Fang et al.                    | Glutamine enriched TPN                                                        | Nutrient modified diet      | Not found |

|                                                                                                                                                                                                                                                              |                      |                                                                          |                             |           |
|--------------------------------------------------------------------------------------------------------------------------------------------------------------------------------------------------------------------------------------------------------------|----------------------|--------------------------------------------------------------------------|-----------------------------|-----------|
| Effect of conjugated linoleic acid supplementation on quality of life in rectal cancer patients undergoing preoperative chemoradiotherapy                                                                                                                    | Faramarzi et al.     | Conjugated linoleic acid supplementation                                 | Nutrient modified diet      | 28523042  |
| Effects of $\omega$ -3 supplementation on the nutritional status, immune, and inflammatory profiles of gastric cancer patients: A randomized controlled trial                                                                                                | Feijo et al.         | Omega-3 supplementation                                                  | Nutrient modified diet      | 30710885  |
| Effects of a nutrition intervention on acute and late bowel symptoms and health-related quality of life up to 24 months post radiotherapy in patients with prostate cancer: a multicentre randomised controlled trial                                        | Forslund et al.      | Dietary counseling promoting high soluble fiber, low-lactose diet        | Fiber modified diet         | 31758324  |
| Dynamic metabolic response of prostate cancer patients treated with ADT and low carb diet                                                                                                                                                                    | Freedland et al.     | Low-carb diet                                                            | Energy modified diet        | Not found |
| A Randomized Controlled Trial of a 6-Month Low-Carbohydrate Intervention on Disease Progression in Men with Recurrent Prostate Cancer: Carbohydrate and Prostate Study 2 (CAPS2)                                                                             | Freedland et al.     | Low-carb diet                                                            | Energy modified diet        | 33712498  |
| Effect of postoperative diet nursing with patient involved on nutritional status of the patients with rectal cancer                                                                                                                                          | Gan et al.           | Postoperative diet nursing                                               | Nutrition counseling        | Not found |
| Effect of Targeted Nutritional Intervention on Intestinal Flora, Defecation Function, and Postoperative Complications in Patients Who Underwent Radical Resection of Rectal Carcinoma                                                                        | Gao et al.           | Targeted nutritional intervention with probiotic supplementation         | Nutrient modified diet      | Not found |
| Randomized comparison of cooked and noncooked diets in patients undergoing remission induction therapy for acute myeloid leukemia                                                                                                                            | Gardner et al.       | Neutropenic diet                                                         | Restrictive eating patterns | 18955453  |
| Effect of Standardized Nutritional Intervention in Patients with Nasopharyngeal Carcinoma Receiving Radiotherapy Complicated with Diabetes Mellitus                                                                                                          | Ge et al.            | Nutritional intervention via online for weight and blood glucose control | Nutrition counseling        | 35756497  |
| Immune Nutrition in Head and Neck Cancer. A Double Blind Randomised Controlled Trial of Perioperative Immune Enhancing Feeds in Patients with Advanced Head and Neck Cancer                                                                                  | Ghosh et al.         | Immune enhancing feeds                                                   | Nutrition support           | Not found |
| A randomized controlled trial of preoperative oral supplementation with a specialized diet in patients with gastrointestinal cancer                                                                                                                          | Gianotti et al.      | Supplemented liquid diet                                                 | Nutrient modified diet      | 12055582  |
| Route and composition of postoperative nutritional support: Impact on immune-metabolic response and postoperative outcome                                                                                                                                    | Gianotti et al.      | Immunonutrition                                                          | Nutrition support           | Not found |
| Short-term preoperative supplementation of an immunoenriched diet does not improve clinical outcome in well-nourished patients undergoing abdominal cancer surgery                                                                                           | Giger pabst et al.   | Immuno enriched formula                                                  | Nutrient modified diet      | Not found |
| Evaluation of perioperative nutritional therapy in patients with gastrointestinal tract neoplasms                                                                                                                                                            | Gomez sanchez et al. | Perioperative immune enhancing formula                                   | Nutrient modified diet      | 22072355  |
| Efficacy evaluation of an oral powder supplement enriched with eicosapentaenoic acid in cancer patients                                                                                                                                                      | Gomez candela        | Eicosapentaenoic acid supplementation                                    | Nutrient modified diet      | 22411387  |
| A combination of tomato and soy products for men with recurring prostate cancer and rising prostate specific antigen                                                                                                                                         | Grainger et al.      | Diet rich in tomato products and soy protein supplements                 | Nutrient modified diet      | 18444145  |
| Effects of a dietary intervention to increase omega-3 intake compared to dutasteride in men with low-risk prostate cancer under active surveillance: Preliminary results on fatty acid intake and fatty acid profiles of red blood cells and prostate tissue | Guertin et al.       | Dietary intervention aiming to increase omega-3 intake                   | Nutrient modified diet      | Not found |
| The effect of immunonutrition on tumor infiltrative t lymphocytes and regulatory t cells in rectal tumor patients receiving neoadjuvant chemoradiotherapy: a prospective randomized clinical study                                                           | Gul et al.           | Immunonutrition                                                          | Nutrient modified diet      | 36326418  |
| Effects of emotional intervention and Chinese medicated diet in improving the quality of life in patients with liver cancer after chemotherapy                                                                                                               | Guo et al.           | Chinese medicated diet                                                   | Restrictive eating patterns | Not found |
| A Pilot Randomised Controlled Trial Examining the Benefit of a Neutropenic Diet for Children Undergoing Cancer Treatment                                                                                                                                     | Gupta et al.         | Neutropenic diet                                                         | Restrictive eating patterns | 35225115  |
| Assessment of Nutritional Status in Children with Cancer and Effectiveness of Oral Nutritional Supplements                                                                                                                                                   | Gurlek et al.        | Hypercaloric oral supplements                                            | Nutrient modified diet      | 26418028  |
| Application of Glutamine-enriched nutrition therapy in childhood acute lymphoblastic leukemia                                                                                                                                                                | Han et al.           | Glutamine enriched nutrition                                             | Nutrient modified diet      | 27401338  |
| Prospective randomized investigation implementing immunonutritional therapy using a nutritional supplement with a high blend ratio of $\omega$ -3 fatty acids during the perioperative period for head and neck carcinomas                                   | Hanai et al.         | Eicosapentaenoic acid supplementation                                    | Nutrient modified diet      | 29420749  |
| Miami NICE trial: Nutritional support for patients incurring chemotherapy side effects                                                                                                                                                                       | Hansra et al.        | Counseling for dietary strategies to mitigate side effects               | Nutrition counseling        | Not found |
| Randomized controlled clinical trial assessing the effects of oral nutritional supplements in postoperative gastric cancer patients                                                                                                                          | Hatao et al.         | Oral nutritional supplements                                             | Nutrient modified diet      | 27807617  |
| Change in women's diet and body mass following intensive intervention for early-stage breast cancer                                                                                                                                                          | Herbert et al.       | Nutrition education program                                              | Nutrition counseling        | 11320947  |

|                                                                                                                                                                                                                                                           |                        |                                                        |                        |           |
|-----------------------------------------------------------------------------------------------------------------------------------------------------------------------------------------------------------------------------------------------------------|------------------------|--------------------------------------------------------|------------------------|-----------|
| Immunonutrition in elective gastrointestinal surgery patients                                                                                                                                                                                             | Helminen et al.        | Perioperative immunonutrition                          | Nutrient modified diet | 17461312  |
| Dietary intervention as adjuvant therapy in breast cancer patients - a feasibility study                                                                                                                                                                  | Holm et al.            | Dietary counseling to reduce fat intake                | Nutrition counseling   | 2265258   |
| A double-blind randomized controlled trial of the effects of eicosapentaenoic acid supplementation on muscle inflammation and physical function in patients undergoing colorectal cancer resection                                                        | Hossain et al.         | Eicosapentaenoic acid supplementation                  | Nutrient modified diet | 31648815  |
| Efficacy of Omega Fatty Acid Supplementation on mRNA Expression Level of Tumor Necrosis Factor Alpha in Patients with Gastric Adenocarcinoma                                                                                                              | Hosseinzadeh et al.    | Polyunsaturated fatty acid supplements                 | Nutrient modified diet | 27170003  |
| A prospective randomized controlled trial on the value of prophylactic oral nutritional supplementation in locally advanced nasopharyngeal carcinoma patients receiving chemo-radiotherapy                                                                | Huang et al.           | Oral nutritional supplements                           | Nutrient modified diet | 33032180  |
| The impact of nutrition support on body composition in cancer outpatients receiving radiotherapy                                                                                                                                                          | Isenring et al.        | Counseling following the American Dietetic Association | Nutrition counseling   | 15226773  |
| Oral nutritional support can shorten the duration of parenteral hydration in end-of-life cancer patients: A randomized controlled trial                                                                                                                   | Ishiki et al.          | Oral nutritional supplements                           | Nutrient modified diet | 25437180  |
| Efficacy of EPA-enriched supplement compared with standard formula on body weight changes in malnourished patients with head and neck cancer undergone surgery: a randomized study                                                                        | Jantharapattana et al. | Eicosapentaenoic acid supplementation                  | Nutrient modified diet | 31647147  |
| An eicosapentaenoic acid supplement versus megestrol acetate versus both for patients with cancer-associated wasting: A North Central Cancer Treatment Group and National Cancer Institute of Canada collaborative effort                                 | Jatoi et al.           | Eicosapentaenoic acid supplementation                  | Nutrient modified diet | 15197210  |
| Structured triglycerides were well tolerated and induced after hepatectomy in patients with hepatocarcinoma                                                                                                                                               | Jia et al.             | Nutrition with structured triglycerides                | Nutrient modified diet | Not found |
| Effect of glutamine's nutrition support on the postoperative nutrition and immune function in malignant tumor of gynecology patients                                                                                                                      | Jiang et al.           | Enteral immunonutrition                                | Nutrition support      | 25016261  |
| Benefits of Oral Nutritional Supplements in Patients with Locally Advanced Nasopharyngeal Cancer during Concurrent Chemoradiotherapy: An Exploratory Prospective Randomized Trial                                                                         | Jiang et al.           | Oral nutritional supplements                           | Nutrient modified diet | 30633580  |
| Vitamin d supplementation and disease-free survival in stage ii melanoma: A randomized placebo controlled trial                                                                                                                                           | Johanson et al.        | Vitamin D supplementation                              | Nutrient modified diet | 34199802  |
| Muscle mass, strength, and index in various models of preoperative immunonutrition in invasive gastric cancer patients                                                                                                                                    | Jurczuk et al.         | Immunonutrition                                        | Nutrient modified diet | Not found |
| Preoperative nutritional support in cancer patients with no clinical signs of malnutrition—prospective randomized controlled trial                                                                                                                        | Kabata et al.          | Oral nutritional supplements                           | Nutrient modified diet | 25091056  |
| Phagocytic activity of blood platelets in various models of preoperative oral immunonutrition in invasive cancer patients                                                                                                                                 | Kamocki et al.         | Immunonutrition                                        | Nutrient modified diet | Not found |
| Lymphocyte subpopulation in a model of preoperative oral and parenteral glutamine-based immunonutrition in patients with invasive gastric cancer                                                                                                          | Kamocki et al.         | Immunonutrition                                        | Nutrient modified diet | Not found |
| Efficacy of perioperative immunonutrition in esophageal cancer patients undergoing esophagectomy                                                                                                                                                          | Kanekiyo et al.        | Perioperative immunonutrition                          | Nutrient modified diet | 30468936  |
| A Prospective Randomized Controlled Trial to Study the Impact of a Nutrition-Sensitive Intervention on Adult Women with Cancer Cachexia Undergoing Palliative Care in India                                                                               | Kapoor et al.          | Immunomodulating supplementation with Improved Atta    | Nutrient modified diet | Not found |
| Randomized study of prevention of gastrointestinal toxicities by nutritional support using an amino acid-rich elemental diet during chemotherapy in patients with esophageal cancer (KDOG 1101)                                                           | Katada et al.          | Amino acid rich elemental diet supplementation         | Nutrient modified diet | 33009977  |
| Effects of 4 weeks of Lactobacillus plantarum 299v supplementation on nutritional status, enteral nutrition tolerance, and quality of life in cancer patients receiving home enteral nutrition - A double-blind, randomized, and placebo-controlled trial | Kazmierzak et al.      | Lactobacillus supplementation                          | Nutrient modified diet | 33015813  |
| Early postoperative enteral nutrition with arginine- $\omega$ -3 fatty acids and ribonucleic acid-supplemented diet versus placebo in cancer patients: An immunologic evaluation of Impact®                                                               | Kemen et al.           | Arginine, RNA, and omega-3 fatty acids                 | Nutrient modified diet | 7536138   |
| Early enteral feeding in postsurgical cancer patients. Fish oil structured lipid-based polymeric formula versus a standard polymeric formula                                                                                                              | Kenler et al.          | Fish oil supplementation                               | Nutrient modified diet | 8604913   |
| Effects of Ketogenic metabolic therapy on patients with breast cancer: A randomized controlled clinical trial                                                                                                                                             | Khodabakhsi et al.     | Ketogenic diet                                         | Energy modified diet   | Not found |
| A Randomized Clinical Trial of Preoperative Administration of Branched-Chain Amino Acids to Prevent Postoperative Ascites in Patients with Liver Resection for Hepatocellular Carcinoma                                                                   | Kikuchi et al.         | BCAA supplementation                                   | Nutrient modified diet | 27338747  |
| The impact of nutritional support on treatment-related complications, qol and survival in lung cancer patients undergoing radiotherapy: A randomized, controlled study                                                                                    | Kilic et al.           | Immunoenriched oral nutritional supplements            | Nutrient modified diet | Not found |

|                                                                                                                                                                                                                                                                                                                 |                      |                                                                             |                        |           |
|-----------------------------------------------------------------------------------------------------------------------------------------------------------------------------------------------------------------------------------------------------------------------------------------------------------------|----------------------|-----------------------------------------------------------------------------|------------------------|-----------|
| The effects of patient participation-based dietary intervention on nutritional and functional status for patients with gastrectomy: A randomized controlled trial                                                                                                                                               | Kim et al.           | Patient participation dietary counseling to increase energy intake          | Nutrition counseling   | 23632471  |
| The Effect of Nutrition Intervention with Oral Nutritional Supplements on Pancreatic and Bile Duct Cancer Patients Undergoing Chemotherapy                                                                                                                                                                      | Kim et al.           | Oral nutritional supplements                                                | Nutrient modified diet | 31121926  |
| The effect of preoperative nutritional supports on patients with gastrointestinal cancer: Prospective randomized study                                                                                                                                                                                          | Kirkil et al.        | Preoperative nutritional supports                                           | Nutrient modified diet | 22260826  |
| The Effects of a Mediterranean Diet Intervention on Cancer-Related Fatigue for Patients Undergoing Chemotherapy: A Pilot Randomized Controlled Trial                                                                                                                                                            | Kleckner et al.      | Mediterranean diet                                                          | Mediterranean diet     | 36077737  |
| The impact of immunostimulating nutrition on infectious complications after upper gastrointestinal surgery: A prospective, randomized, clinical trial                                                                                                                                                           | Klek et al.          | Immunomodulating nutrition                                                  | Nutrient modified diet | 18650630  |
| Standard and immunomodulating enteral nutrition in patients after extended gastrointestinal surgery--a prospective, randomized, controlled clinical trial                                                                                                                                                       | Klek et al.          | Enteral nutrition with immunostimulating diet                               | Nutrition support      | 18571296  |
| L-Carnitine-supplementation in advanced pancreatic cancer (CARPAN) - A randomized multicentre trial                                                                                                                                                                                                             | Kraft et al.         | L-carnitine supplementation                                                 | Nutrient modified diet | 22824168  |
| Dietary intervention in prostate cancer patients: PSA response in a randomized double-blind placebo-controlled study                                                                                                                                                                                            | Kranse et al.        | Supplementation of plant estrogens, antioxidants, carotenoids, and selenium | Nutrient modified diet | Not found |
| Long term improved quality of life by a 2-week group physical and educational intervention shortly after breast cancer chemotherapy completion. Results of the 'Programme of Accompanying women after breast Cancer treatment completion in Thermal resorts' (PACThe) randomised clinical trial of 251 patients | Kwiatkowski et al.   | 2-week session of physical training, dietary education, and physiotherapy   | Nutrition counseling   | 23352440  |
| Influence of pre-operative oral carbohydrate loading vs. standard fasting on tumor proliferation and clinical outcome in breast cancer patients – a randomized trial                                                                                                                                            | Lende, T. H., et al. | Preoperative oral carbohydrate loading                                      | Energy modified diet   | 31703648  |
| Nursing Effect and Prognosis of Perioperative Nutritional Support Therapy for Severe Malnutrition Patients with Colorectal Cancer                                                                                                                                                                               | Li, C. et al.        | Perioperative enteral nutritional support                                   | Nutrition support      | Not found |
| Early enteral immunonutrition support protects the cellular and humoral immune functions of patients with pancreatic cancer after chemotherapy                                                                                                                                                                  | Li, C., et al.       | Immunomodulating enteral nutrition                                          | Nutrition support      | Not found |
| The effect of low-nitrogen and low-calorie parenteral nutrition combined with enteral nutrition on inflammatory cytokines and immune functions in patients with gastric cancer: a double blind placebo trial                                                                                                    | Li, J. H., et al.    | Low-nitrogen and low-calorie parenteral nutrition with enteral nutrition    | Nutrition support      | 25967707  |
| A randomized nutrition counseling intervention in pediatric leukemia patients receiving steroids results in reduced caloric intake                                                                                                                                                                              | Li, R., et al.       | Dietary counsel following the American Academy of Pediatrics recommendation | Nutrition counseling   | 27615542  |
| Enteral immunonutrition versus enteral nutrition for patients undergoing esophagectomy: a double-blinded randomized controlled trial                                                                                                                                                                            | Li, X., et al.       | Enteral immunonutrition                                                     | Nutrition support      | Not found |
| Feasibility of a low-fat/high-fiber diet intervention with soy supplementation in prostate cancer patients after prostatectomy                                                                                                                                                                                  | Li, Z., et al.       | Low-fat fiber modified diet                                                 | Fiber modified diet    | 17392697  |
| A multidisciplinary team approach for nutritional interventions conducted by specialist nurses in patients with advanced colorectal cancer undergoing chemotherapy: A clinical trial                                                                                                                            | Lin, J. et al.       | Individual recipes developed by a team of professionals and the patient     | Nutrition counseling   | 28658162  |
| Effects of Zinc Supplementation on Clinical Outcomes in Patients Receiving Radiotherapy for Head and Neck Cancers: A Double-Blinded Randomized Study                                                                                                                                                            | Lin, L. et al.       | Zinc supplementation                                                        | Nutrient modified diet | 17980503  |
| Effect of Psychological Intervention Combined with Dietary Guidance on Quality of Life and Long-Term Efficacy of Bushen Quyu Decoction in Treatment of Patients with Advanced Ovarian Cancer                                                                                                                    | Liu, D. et al.       | Psychological counseling to maintain a light diet                           | Nutrition counseling   | 34733335  |
| An enhanced nutritional support pathway including extended preoperative and home enteral nutrition is safe, feasible, and may benefit patients undergoing enhanced recovery after esophagectomy: A pilot randomized clinical trial                                                                              | Liu, K. et al.       | Standard nutritional support                                                | Nutrition support      | Not found |
| A Randomized Study on the Effect of Metformin Combined with Intensive-Exercise Diet Therapy on Glucose and Lipid Metabolism and Islet Function in Patients with Renal Cell Carcinoma and Diabetes                                                                                                               | Liu, Y. et al.       | Counseling for an energy modified diet and exercise                         | Nutrition counseling   | Not found |
| Early postoperative jejunostomy feeding with an immune modulating diet in patients undergoing resectional surgery for upper gastrointestinal cancer: a prospective, randomized, controlled, double-blind study                                                                                                  | Lobo et al.          | Postoperative immunomodulating nutrition                                    | Nutrient modified diet | Not found |
| Feasibility and efficacy of progressive resistance training and dietary supplements in radiotherapy treated head and neck cancer patients-the DAHANCA 25A study                                                                                                                                                 | Lonbro, S. et al.    | Protein and creatinine supplementation before exercise                      | Nutrient modified diet | 23190359  |
| Analysis of the Effect of Exercise Combined with Diet Intervention on Postoperative Quality of Life of Breast Cancer Patients                                                                                                                                                                                   | Lu, L.               | High protein, high energy, and high vitamin supplementation                 | Nutrient modified diet | 35669367  |



|                                                                                                                                                                                                                                          |                           |                                                                                    |                        |           |
|------------------------------------------------------------------------------------------------------------------------------------------------------------------------------------------------------------------------------------------|---------------------------|------------------------------------------------------------------------------------|------------------------|-----------|
| Palliative Nutritional Intervention in Addition to Cyclooxygenase and Erythropoietin Treatment for Patients with Malignant Disease: Effects on Survival, Metabolism, and Function: A Randomized Prospective Study                        | Lundholm, K. et al.       | Counseling with oral and parenteral supplements (450–600 kcal per day)             | Nutrition support      | 15112279  |
| The effect of zinc sulfate in the prevention of high-dose chemotherapy-induced mucositis: a double-blind, randomized, placebo-controlled study                                                                                           | Mansouri, A. et al.       | Zinc supplementation                                                               | Nutrient modified diet | 21692101  |
| Immunonutrition to improve the quality of life of upper gastrointestinal cancer patients undergoing neoadjuvant treatment prior to surgery (NEOIMMUNE): Double blind randomized controlled multi-center clinical trial                   | Markar, S. et al.         | Immuno-nutrients supplementation                                                   | Nutrient modified diet | Not found |
| Ketogenic diets as an adjuvant therapy for glioblastoma (KEATING): a randomized, mixed methods, feasibility study                                                                                                                        | Martin-McGill, K. J.      | Ketogenic Diet                                                                     | Energy modified diet   | Not found |
| An exercise and nutrition intervention for ovarian cancer patients during and after first-line chemotherapy (BENITA study): A randomized controlled pilot trial                                                                          | Maurer, T. et al.         | 12-month exercise and increasing protein and calorie intake                        | Nutrition counseling   | 35197344  |
| The effect of nutritional supplements on food intake in patients undergoing radiotherapy                                                                                                                                                 | McCarthy, D. et al.       | Liquid nutritional supplement                                                      | Nutrient modified diet | 10382188  |
| Is supplementation with elemental diet feasible in patients undergoing pelvic radiotherapy?                                                                                                                                              | McGough, C. et al.        | Elemental nutritional supplement                                                   | Nutrient modified diet | 16289498  |
| Effect of preoperative immunonutrition in patients undergoing hepatectomy; a randomized controlled trial                                                                                                                                 | Mikagi, K. et al.         | Immunonutrition supplement                                                         | Nutrient modified diet | 30741015  |
| Efficacy of prolonged elemental diet therapy after pancreaticoduodenectomy for pancreatic ductal adenocarcinoma: A pilot prospective randomized trial (UMIN000004108)                                                                    | Mori, R. et al.           | Elemental nutritional supplement                                                   | Nutrient modified diet | 31677701  |
| Effects of medical nutrition therapy compared with general nutritional advice on nutritional status and nutrition-related complications in esophageal cancer patients receiving concurrent chemoradiation: A randomized controlled trial | Movahed, S. et al.        | Individualized nutritional therapy                                                 | Nutrition counseling   | Not found |
| Perioperative standard oral nutrition supplements versus immunonutrition in patients undergoing colorectal resection in an Enhanced Recovery (ERAS) protocol                                                                             | Moya, P. et al.           | Immunonutrition                                                                    | Nutrient modified diet | Not found |
| Multicenter, phase III trial comparing selenium supplementation with observation in gynecologic radiation oncology: Follow-up analysis of the survival data 6 years after cessation of randomization                                     | Muecke, R. et al.         | Selenium supplementation                                                           | Nutrient modified diet | 25015649  |
| Effects of dietary supplements of pediasure and carnitine on the anthropometric indices in children with acute lymphoblastic leukemia under chemotherapy, in Afzalipour Hospital, Kerman, Iran                                           | Naderi, A. et al.         | Supplementation with Pediasure and carnitine                                       | Nutrient modified diet | Not found |
| Impact of nutritional supplementation on treatment delay and morbidity in patients with head and neck tumors treated with irradiation                                                                                                    | Nayel, H. et al.          | Nutrition supplementation                                                          | Nutrient modified diet | 1562782   |
| Parenteral nutrition effects of Omega-3 fatty acids on C-reactive protein, high-density lipoprotein, lymphocyte characteristics and the treatment of critically ill patients                                                             | Ni, C. et al.             | Omega-3 fish oil fat emulsion supplementation                                      | Nutrient modified diet | 32538747  |
| Effects of branched-chain amino acid supplementation after radiofrequency ablation for hepatocellular carcinoma: A randomized trial                                                                                                      | Nojiri, S. et al.         | BCAA supplementation                                                               | Nutrient modified diet | 27908546  |
| Prostatic concentration of soy isoflavone exceeds serum after dietary supplementation                                                                                                                                                    | Oelrich, B. et al.        | Daily soy supplements                                                              | Nutrient modified diet |           |
| L-Alanin-L-Glutamine supplementation improves the outcome after colorectal surgery for cancer                                                                                                                                            | Oguz, M. et al.           | L-Alanin-L-Glutamine supplementation                                               | Nutrient modified diet | 17573745  |
| Oral supplementation with carbohydrate- and branched-chain amino acid-enriched nutrients improves postoperative quality of life in patients undergoing hepatic resection                                                                 | Okabayashi, T. et al.     | Supplementation with BCAA-enriched nutrient                                        | Nutrient modified diet | 20852905  |
| Attenuation of the systemic inflammatory response and infectious complications after gastrectomy with preoperative oral arginine and $\omega$ -3 fatty acids supplemented immunonutrition                                                | Okamoto, Y. et al.        | Fatty acids supplemented immunonutrition                                           | Nutrient modified diet | 19629583  |
| Nutritional behaviour and quality of life during oncological polychemotherapy: Results of a prospective study on the efficacy of oral nutrition therapy in patients with acute leukaemia                                                 | Ollenschlaeger, G. et al. | Education and daily dietician visits to increase protein and calorie intake        | Nutrition counseling   | 1425861   |
| Nutritional supplementation with an immunenhancing formula in the patients with esophageal cancer                                                                                                                                        | Panova, N. et al.         | Enteral immune-enhancing nutrition supplementation                                 | Nutrient modified diet | Not found |
| Dramatic dietary fat reduction is feasible for breast cancer patients: Results of the randomised study, WINS (UK) - stage I                                                                                                              | Parry, B. M. et al.       | Dietary counseling to halve their reported fat intake                              | Energy modified diet   | 21868187  |
| The Men's Eating and Living (MEAL) Study: A Cancer and Leukemia Group B Pilot Trial of Dietary Intervention for the Treatment of Prostate Cancer                                                                                         | Parsons, J. K. et al.     | Telephone-based counseling to increase vegetables, whole grains, and beans/legumes | Nutrition counseling   | Not found |
| A randomized pilot trial of dietary modification for the chemoprevention of noninvasive bladder cancer: The Dietary Intervention in Bladder Cancer Study                                                                                 | Parsons, J. K. et al.     | Telephone and Skype dietary counseling                                             | Nutrition counseling   | 23867158  |

|                                                                                                                                                                                                                 |                              |                                                                      |                             |           |
|-----------------------------------------------------------------------------------------------------------------------------------------------------------------------------------------------------------------|------------------------------|----------------------------------------------------------------------|-----------------------------|-----------|
| Effect of a Behavioral Intervention to Increase Vegetable Consumption on Cancer Progression Among Men With Early-Stage Prostate Cancer: The MEAL Randomized Clinical Trial                                      | Parsons, J. K. et al.        | Telephone-based counseling                                           | Nutrition counseling        | 32586177  |
| A randomized study of nutritional support in patients with colorectal and gastric cancer                                                                                                                        | Persson, C. R. et al.        | Individualized nutritional support                                   | Nutrition counseling        | 12235650  |
| Effects of a dietary intervention on acute gastrointestinal side effects and other aspects of health-related quality of life: A randomized controlled trial in prostate cancer patients undergoing radiotherapy | Petersson, A. et al.         | Low soluble fiber and lactose diet                                   | Nutrition counseling        | 22633817  |
| Shrinking preoperative fast time with maltodextrin and protein hydrolysate in gastrointestinal resections due to cancer                                                                                         | Peixe-Machado, P. A. et al.  | Hydrolyzed protein to a carbohydrate-based nutrition supplementation | Nutrient modified diet      | 23759267  |
| Influence of a diet very high in vegetables, fruit, and fiber and low in fat on prognosis following treatment for breast cancer: the Women's Healthy Eating and Living (WHEL) randomized trial                  | Pierce, J. P. et al.         | High in vegetables, fruit, and fiber and low in fat                  | Nutrient modified diet      | 17635889  |
| Long-term oral branched chain amino acids in patients undergoing chemoembolization for hepatocellular carcinoma: A randomized trial                                                                             | Poon, R. T. P. et al.        | BCAA supplementation                                                 | Nutrient modified diet      | 15043519  |
| Nutritional counseling in patients with head, neck and esophagus cancer in (chemo)radiotherapy                                                                                                                  | Pootz, S. et al.             | Nutritional counseling on education for nutritional status           | Nutrition counseling        | Not found |
| Randomized trial of the effects of individual nutritional counseling in cancer patients                                                                                                                         | Poulsen, G. M. et al.        | Individualized nutrition counseling                                  | Nutrition counseling        | 24269077  |
| Efficacy of ready-to-use therapeutic food in malnourished children with cancer: Results of a randomized, open-label phase 3 trial                                                                               | Prasad, M. et al.            | Ready-to-use therapeutic food supplementation                        | Nutrient modified diet      | 34212474  |
| Postoperative early enteral nutrition therapy with long peptide mixture for gastric cancer patients: A clinical control study                                                                                   | Pu, J. et al.                | Early enteral peptide-based feeding                                  | Nutrition support           | Not found |
| Effect of whole-course nutrition management on patients with esophageal cancer undergoing concurrent chemoradiotherapy: A randomized control trial                                                              | Qiu, Y. et al.               | Nutrition support team                                               | Nutrition counseling        | 31526964  |
| Neutropenic versus regular diet for acute leukaemia induction chemotherapy: randomised controlled trial                                                                                                         | Radhakrishnan, V. et al.     | Neutropenic diet                                                     | Restrictive eating patterns | 35803707  |
| Association between amino acids, biomarkers of prostate cancer and inflammation in norwegian prostate cancer patients                                                                                           | Rangel Huerta, O. D. et al.  | 30 mg lycopene per day supplementation                               | Nutrient modified diet      | Not found |
| Individualized nutrition intervention is of major benefit to colorectal cancer patients: Long-term follow-up of a randomized controlled trial of nutritional therapy                                            | Ravasco, P. et al.           | Individualized nutritional counseling                                | Nutrition counseling        | 23134880  |
| Effect of a specific supplement enriched with n-3 polyunsaturated fatty acids on markers of inflammation, oxidativestress and metabolic status of ear, nose and throat cancer patients                          | Roca-Rodríguez, M. M. et al. | N-3 polyunsaturated fatty acids, fiber, and protein supplementation  | Nutrient modified diet      | Not found |
| Effect of Early Peripheral Parenteral Nutrition Support in an Enhanced Recovery Program for Colorectal Cancer Surgery: A Randomized Open Trial                                                                  | Sanchez-Guillien             | Perioperative peripheral nutrition of PeriOliclimonel                | Nutrition support           | Not found |
| Effects of an oral nutritional supplement containing eicosapentaenoic acid on nutritional and clinical outcomes in patients with advanced non-small cell lung cancer: randomised trial                          | Sánchez-Lara, K. et al.      | Eicosapentaenoic acid supplementation                                | Nutrient modified diet      | 24746976  |
| Effects of a Plant-Based High-Protein Diet on Fatigue in Breast Cancer Patients Undergoing Adjuvant Chemotherapy—a Randomized Controlled Trial                                                                  | Sathiaraj, E. et al.         | Plant-based high-protein diet                                        | Restrictive eating patterns | 36546552  |
| Randomized, double-blind, controlled study of glycyl-glutamine-dipeptide in the parenteral nutrition of patients with acute leukemia undergoing intensive chemotherapy                                          | Scheid, C. et al.            | Parenteral support with glycyl-glutamine-dipeptide nutrition         | Nutrition support           | 14990264  |
| Randomized, double-blind, placebo-controlled crossover study in men with prostate cancer and rising PSA: Effectiveness of a dietary supplement                                                                  | Schröder, F. H. et al.       | Soy-based dietary supplement                                         | Nutrient modified diet      | 16263208  |
| Effects of an exercise and hypocaloric healthy eating program on biomarkers associated with long-term prognosis after early-stage breast cancer: A randomized controlled trial                                  | Scott, E. et al.             | Hypocaloric healthy eating                                           | Energy modified diet        | 23184120  |
| Effect of a Perioperative Nutritional Supplementation with Oral Impact® in Patients Undergoing Hepatic Surgery for Liver Cancer: A Prospective, Placebo-Controlled, Randomized, Double-Blind Study              | Seguin, P. et al.            | Perioperative nutritional supplementation                            | Nutrient modified diet      | 27007018  |
| Preoperative oral supplementation with long-chain Ω-3 fatty acids beneficially alters phospholipid fatty acid patterns in liver, gut mucosa, and tumor tissue                                                   | Senkal, M. et al.            | Oral supplementation with long-chain omega-3 fatty acids             | Nutrient modified diet      | 15961678  |
| Comprehensive Diet and Exercise Intervention During Radiation Therapy Can Improve Metabolic and Inflammatory Markers in Breast Cancer Patients                                                                  | Senthilkumar, G. et al.      | Dietary counseling sessions                                          | Nutrition counseling        | Not found |

|                                                                                                                                                                                                                                     |                          |                                                                        |                             |           |
|-------------------------------------------------------------------------------------------------------------------------------------------------------------------------------------------------------------------------------------|--------------------------|------------------------------------------------------------------------|-----------------------------|-----------|
| To compare outcome of Intensive nutritional support with standard practise in head and neck cancer                                                                                                                                  | Shahid, T. et al.        | Nutrition counseling following the American Dietetic Association       | Nutrition counseling        | Not found |
| Chinese food therapy combined with chemotherapy in the treatment of advanced ovarian cancer based on                                                                                                                                | Shang, C. L. et al.      | Traditional Chinese Medicinal dietary supplements                      | Nutrient modified diet      | Not found |
| Randomized controlled trial comparing a low-fat diet with a weight-reduction diet in breast cancer-related lymphedema                                                                                                               | Shaw, C. et al.          | Hypocaloric and low-fat diet                                           | Energy modified diet        | 17393377  |
| Application of the Diet and Nutrition Management System in the Nutrition Management of Tumor Patients Treated with Chemotherapy                                                                                                     | She, G. et al.           | Counseling following nutritional management system                     | Nutrition counseling        | Not found |
| Influence of nutritional support on tolerability and results of treatment in patients with newly diagnosed hemoblastoses received program chemotherapy                                                                              | Shen, N. P. et al.       | Protein supplement for underweight patients                            | Energy modified diet        | Not found |
| Effect of early nutritional support on the clinical efficacy of gastrointestinal cancer patients                                                                                                                                    | Shen, X. J. et al.       | Enteral nutrition in the postoperative treatment                       | Nutrition support           | Not found |
| Phase II randomized controlled trial (RCT) of medical intensive nutrition therapy (MINT) to improve chemotherapy (CT) tolerability in malnourished patients with solid tumor malignancies                                           | Shusterman, M. et al.    | Counseling of medical intensive nutrition therapy                      | Nutrition counseling        | Not found |
| Potential benefits of early nutritional intervention in adults with upper gastrointestinal cancer: a pilot randomised trial                                                                                                         | Silvers, M. A. et al.    | Telehealth nutritional counseling                                      | Nutrition counseling        | Not found |
| Anorexia-cachexia syndrome in cancer patients: Pathogenetic aspects and treatment options                                                                                                                                           | Snegovoy, A. V. et al.   | Enteral nutritional support                                            | Nutrition support           | Not found |
| Reduced postoperative infections with an immune-enhancing nutritional supplement                                                                                                                                                    | Snyderman, C. H. et al.  | Immune-enhancing nutritional supplement                                | Nutrient modified diet      | 10369282  |
| Randomised controlled trial of one week strict low-iodine diet versus one week non-specified low iodine diet in differentiated thyroid carcinoma                                                                                    | Sohaimi, W. F. W. et al. | Low-iodine diet                                                        | Restrictive eating patterns | Not found |
| Rapid Incorporation of ω-3 Fatty Acids into Colonic Tissue after Oral Supplementation in Patients with Colorectal Cancer: A Randomized, Placebo-Controlled Intervention Trial                                                       | Sorensen, L. S. et al.   | ω-3 fatty acid supplementation                                         | Nutrient modified diet      | 23788002  |
| Effect of a leucine-rich supplement in combination with nutrition and physical exercise in advanced cancer patients: A randomized controlled intervention trial                                                                     | Storck, L. J. et al.     | Leucine-rich supplementation                                           | Nutrient modified diet      | 32340904  |
| Effect of targeted nutrition intervention on defecation and postoperative complications in patients undergoing radical resection for rectal cancer                                                                                  | Sun, Q. Y. et al.        | In-patient management of care by a dietitian/nutritionist              | Nutrition counseling        | Not found |
| A randomized, double blind comparative study of prophylactic parenteral nutritional support with or without glutamine in autologous stem cell transplantation for hematological malignancies - Three years' follow-up               | Sykorova, A. et al.      | Glutamine-enriched parenteral nutrition                                | Nutrition support           | 16284692  |
| Randomized Controlled Trial Investigating Perioperative Immunonutrition for Patients Undergoing Cytoreductive Surgery (CRS) and Hyperthermic Intraperitoneal Chemotherapy (HIPEC)                                                   | Tan, G. H. C. et al.     | Immunonutrition                                                        | Nutrient modified diet      | 36394687  |
| Effect of different nutritional support modes on humoral immunity and outcomes after esophagectomy                                                                                                                                  | Tan, T. C. et al.        | Mixed enteral nutrition or enteral nutrition and parenteral nutrition  | Nutrition support           | Not found |
| Evolution of inflammatory markers in patients with advanced head and neck carcinoma with prophylactic percutaneous gastrostomy                                                                                                      | Tapia, M. J. et al.      | Nutritional therapy vs. prophylactic gastrostomy                       | Nutrition counseling        | Not found |
| Preoperative nutritional support for patients undergoing elective colorectal cancer surgery - does it really work?                                                                                                                  | Tesar, M. et al.         | Preoperative oral nutritional supplements                              | Nutrient modified diet      | 35258042  |
| A double blind, placebo controlled randomised trial (RCT) evaluating the effect of a polyphenol rich whole food supplement on PSA progression in men                                                                                | Thomas, R. et al.        | Oral supplement of pomegranate seed, green tea, broccoli, and turmeric | Nutrient modified diet      | Not found |
| Longitudinal changes in body weight and body composition among women previously treated for breast cancer consuming a high-vegetable, fruit and fiber, low-fat diet                                                                 | Thomson et al.           | Diet high in fruit,vegetables and fiber, and low in fat                | Restrictive eating patterns | 15309460  |
| beta-carotene supplementation in patients radically treated for stage I-II head and neck cancer: results of a randomized trial                                                                                                      | Toma et al.              | Beta carotene supplement                                               | Nutrient modified diet      | 14534715  |
| Transcriptional changes in prostate of men on active surveillance after a 12-mo glucoraphanin-rich broccoli intervention-results from the Effect of Sulforaphane on Prostate Cancer PrEvention (ESCAPE) randomized controlled trial | Traka et al.             | Supplement of broccoli soup                                            | Nutrient modified diet      | 30982861  |
| Oral administration of the amino acids cystine and theanine attenuates the adverse events of S-1 adjuvant chemotherapy in gastrointestinal cancer patients                                                                          | Tsuchiya et al.          | Cystine and theanine supplementation                                   | Nutrient modified diet      | 27306219  |
| Perioperative immunonutrition in well-nourished patients undergoing surgery for head and neck cancer: Evaluation of inflammatory and immunologic outcomes                                                                           | Turnock et al.           | Immunonutrition supplementation                                        | Nutrient modified diet      | 23571650  |

|                                                                                                                                                                                                                                     |                    |                                                                           |                        |           |
|-------------------------------------------------------------------------------------------------------------------------------------------------------------------------------------------------------------------------------------|--------------------|---------------------------------------------------------------------------|------------------------|-----------|
| Glutamine-enriched nutrition does not reduce mucosal morbidity or complications after stem-cell transplantation for childhood malignancies: A prospective randomized study                                                          | Uderzo et al.      | Parenteral supplementation with glutamine                                 | Nutrition support      | 21499196  |
| Influence of a nutritional intervention on dietary intake and quality of life in cancer patients: A randomized controlled trial                                                                                                     | Uster et al.       | Nutritional supplements and counseling for energy and protein requirement | Nutrition counseling   | 24103511  |
| Effects of nutrition and physical exercise intervention in palliative cancer patients: A randomized controlled trial                                                                                                                | Uster et al.       | Nutritional counseling and exercise to meet protein requirements          | Nutrition counseling   | 28651827  |
| Calorie restriction and synbiotics effect on quality of life and edema reduction in breast cancer-related lymphedema, a clinical trial                                                                                              | Vafa et al.        | Calorie restricted diet plus colony forming unit synbiotic supplement     | Energy modified diet   | 32898787  |
| Randomized phase 2 study of gemcitabine and cisplatin with or without vitamin supplementation in patients with advanced esophagogastric cancer                                                                                      | Van Zweeden et al. | Vitamin B12 and folic acid supplementation                                | Nutrient modified diet | 29696360  |
| Immunonutrition improves functional capacities in head and neck and esophageal cancer patients undergoing radiochemotherapy: A randomized clinical trial                                                                            | Vasson et al.      | Immunomodulating supplementation                                          | Nutrient modified diet | 23849811  |
| Preventing weight gain during adjuvant chemotherapy for breast cancer: A dietary intervention study                                                                                                                                 | Villarini et al.   | Mediterranean diet                                                        | Mediterranean diet     | 22869285  |
| ERGO2: A prospective randomized trial of a 9-day schedule of calorically restricted ketogenic diet and fasting or standard diet in addition to re-irradiation for malignant glioma                                                  | Voss et al.        | Calorically-restricted ketogenic diet and intermittent fasting            | Energy modified diet   | 32619561  |
| Effect of glutamine-enriched nutritional support on intestinal mucosal barrier function, MMP-2, MMP-9 and immune function in patients with advanced gastric cancer during perioperative chemotherapy                                | Wang et al.        | Patenteral nutrition with glutamine supplementation                       | Nutrition support      | 28927119  |
| Effects of glutamine on plasma endotoxin and immune function in postoperative patients with laryngeal carcinoma                                                                                                                     | Wang et al.        | Parenteral nutrition containing glutamine-bipeptide                       | Nutrition support      | Not found |
| Clinical trial: Efficacy of a low or modified fat diet for the prevention of gastrointestinal toxicity in patients receiving radiotherapy treatment for pelvic malignancies                                                         | Wedlake et al.     | Low-fat diet                                                              | Energy modified diet   | 22515941  |
| High fibre diet, low fibre diet or habitual diet for the prevention of radiation-induced toxicity in pelvic cancer: A multi-centre randomised controlled trial                                                                      | Wedlake et al.     | High-fiber diet                                                           | Fiber modified diet    | Not found |
| Dietary supplementation with n-3-fatty acids in patients with pancreatic cancer and cachexia: marine phospholipids versus fish oil - a randomized controlled double-blind trial                                                     | Werner et al.      | Fish oil supplementation                                                  | Nutrient modified diet | 28578704  |
| Effects of Perioperative Oral Nutrition Supplementation in Malaysian Patients Undergoing Elective Surgery for Breast and Colorectal Cancers—A Randomised Controlled Trial                                                           | Wong et al.        | Perioperative ONS supplementation                                         | Nutrient modified diet | 35276977  |
| A study of caloric restriction versus standard diet in overweight men with newly diagnosed prostate cancer: A randomized controlled trial                                                                                           | Wright et al.      | Low calorie diet                                                          | Energy modified diet   | 23775525  |
| A randomized controlled trial of postoperative artificial nutrition in malnourished patients with gastrointestinal cancer                                                                                                           | Wu et al.          | Mixed enteral/parenteral artificial nutrition                             | Nutrition support      | 18000777  |
| Preoperative enteral immunonutrition improves postoperative outcome in patients with gastrointestinal cancer                                                                                                                        | Xu et al.          | Preoperative immunonutrition                                              | Nutrient modified diet | 16830214  |
| Effect of a nutritional therapy using a late evening snack for hepatocellular carcinoma                                                                                                                                             | Yamasaki et al.    | BCAA supplementation                                                      | Nutrient modified diet | Not found |
| Impact of Enhanced Recovery after Surgery with Preoperative Whey Protein-Infused Carbohydrate Loading and Postoperative Early Oral Feeding among Surgical Gynecologic Cancer Patients: An Open-Labelled Randomized Controlled Trial | Yi et al.          | Preoperative whey protein-infused carbohydrate loading                    | Nutrient modified diet | 31968595  |
| Impact of perioperative enteral immunonutrition in patients with gastrointestinal cancer undergoing elective surgery: a randomized controlled trial                                                                                 | Yu et al.          | Immunomodulating nutrition                                                | Nutrient modified diet | Not found |
| Effect of Qihuang Decoction Combined with Enteral Nutrition on Postoperative Gastric Cancer of Nutrition and Immune Function                                                                                                        | Yu et al.          | Qihuang decoction supplement                                              | Nutrient modified diet | 32215032  |
| Impact of hypocaloric and hyponitrogenic parenteral nutrition on clinical outcome in postoperative patients: A multi-center randomized controlled trial of 120 cases                                                                | Zhan et al.        | Hypocaloric and hypo-nitrogen parenteral nutrition                        | Nutrition support      | 17919374  |
| Roles of clinical pharmacists in nutritional therapy for gastric cancer patients treated with neoadjuvant chemotherapy                                                                                                              | Zhang et al.       | Nutrition counseling from clinical pharmacists                            | Nutrition counseling   | Not found |
| Effect of postoperative precision nutrition therapy on postoperative recovery for advanced gastric cancer after neoadjuvant chemotherapy                                                                                            | Zhao et al.        | Postoperative precision nutrition therapy                                 | Nutrition support      | Not found |
| Nutritional support of pediatric patients with cancer consuming an enteral formula with fructooligosaccharides                                                                                                                      | Zheng et al.       | Fructooligosaccharide supplement                                          | Nutrition support      | Not found |
| Effect of oral nutritional supplementation on the post-discharge nutritional status and quality of life of gastrointestinal cancer patients after surgery: a multi-center study                                                     | Zhu et al.         | Perioperative oral nutritional supplementation                            | Nutrient modified diet | 31464391  |

|                                                                                             |            |                          |                        |          |
|---------------------------------------------------------------------------------------------|------------|--------------------------|------------------------|----------|
| Improvement of constipation in leukemia patients undergoing chemotherapy using sweet potato | Zou et al. | Sweet potato consumption | Nutrient modified diet | 25881813 |
|---------------------------------------------------------------------------------------------|------------|--------------------------|------------------------|----------|
